# Supplementary material for: Multisite atomic-chlorine-passivation stabilizes perovskite interfaces for efficient H2O2 photosynthesis from seawater
Source: Research Square preprint supplement (doi:10.21203/rs.3.rs-7187821/v1), 2025-09-17
Supplement: Supplementary file 1 [file 5b84902986e5cf49511f0128.docx]

**Supplementary Information**

**Multisite atomic-chlorine-passivation stabilizes perovskite interfaces for efficient H₂O₂ photosynthesis from seawater**

Genping Meng1#, Shuai Wei1#, Ning Li1#, Yuhui Yin1, Bin Dong1, Shihao Sun1, Guowen Hu1, Hao Wang1,**🖂** and Baodui Wang1,**🖂**

1State Key Laboratory of Applied Organic Chemistry, Key Laboratory of Nonferrous Metal Chemistry and Resources Utilization of Gansu Province, College of Chemistry and Chemical Engineering, Lanzhou University, Gansu, Lanzhou, 730000. P. R. China.

#These authors contributed equally to this work.

Email: [wangh2019@lzu.edu.cn](mailto:wangh2019@lzu.edu.cn); wangbd@lzu.edu.cn

Supplementary Information

1. Supplementary Methods 3

2. Supplementary Figures 6

3. Supplementary Tables 42

4. References 58

1. Supplementary Methods

**Materials and Chemicals.** 2,5-Dichloroterephthalaldehyde (PDA-Cl, 95%), 2,5-dibromoterephthalaldehyde (PDA-Br, 95%), and 2,5-diiodoterephthalaldehyde (PDA-I, 95%) were obtained from Zhongke Yanshen Technology Co., Ltd. (Jilin, China). Lead(II) iodide (PbI2, 99.99%) were procured as perovskite-grade reagents from Tokyo Chemical Industry (TCI). Cesium iodide (CsI, 99.99%) was obtained from Aladdin Industrial Corporation. Oleic acid (OA, 90%) and oleylamine (OAm, 98%) were purchased from Sigma-Aldrich. 4-Aminobenzonitrile (C7H6N2, 98%), trifluoromethanesulfonic acid (CF3SO3H, 98%), 2,2,6,6-tetramethylpiperidine (TEMP, 99%), and 5,5-dimethyl-1-pyrroline N-oxide (DMPO, 97%) were acquired from Macklin Biochemical Co., Ltd. Potassium iodide (KI, analytical grade) was supplied by Cologne Chemicals Co., Ltd. Potassium hydrogen phthalate (KHC8H4O4, 99.9%) was purchased from Tianjin Chemical Reagent Research Institute. All other reagents and solvents were sourced from standard laboratory chemical suppliers. All chemicals were used as received without any further purification.

**Characterization.** The sample morphology was examined using a field emission scanning electron microscope (FE-SEM; FEI Sirion 200). Transmission electron microscopy (TEM) analyses were conducted on an FEI Tecnai G2-F30 electron microscope at an accelerating voltage of 200 kV. Powder X-ray diffraction (PXRD) patterns were obtained using an AXS D8-Advanced diffractometer with Cu-Kα radiation. Nitrogen adsorption-desorption measurements were performed on a fully automated surface area and porosity analyzer (ASAP 2020M); the specific surface area was calculated based on the Brunauer-Emmett-Teller (BET) model, and the pore size distribution was evaluated using the non-local density functional theory (NLDFT) model. X-ray photoelectron spectroscopy (XPS), valence band XPS (VB XPS), and ultraviolet photoelectron spectroscopy (UPS) measurements were carried out using a PHI5702 multifunctional spectrometer with Al-Kα radiation. Fourier-transform infrared (FTIR) spectra at room temperature were recorded on a Nicolet FT-170SX spectrometer. Thermogravimetric (TG) analysis was performed using a TGA/DSC3+/Sartorius/MCA125S-2CCN-1 thermogravimetric/differential thermal analyzer. Contact angle measurements were conducted using an SZ-CAMB3 instrument. Photoluminescence (PL) spectra and time-resolved fluorescence decay spectra (TRFDS) were collected using an Edinburgh Instruments FLS920 steady-state fluorescence spectrometer and a transient fluorescence spectrometer, respectively. Solid-state UV-Vis diffuse reflectance spectra (DRS) were measured using a UV-2006 ultraviolet spectrophotometer. The photoelectrochemical properties of the samples were tested using a CHI760E electrochemical workstation (Shanghai Chenhua Instrument Co., Ltd, China). Photocatalytic tests were performed using a xenon lamp (HSXF/UV 300) equipped with 400-800 nm filters. Proton nuclear magnetic resonance (¹H NMR and 13C NMR) spectra were acquired on a JEOL ESC 400 M instrument using tetramethylsilane (TMS) as the internal standard. Time-resolved spectra were fitted with a biexponential function, and the average lifetime was calculated using the following formula: Standard silica particles dispersed in water were used as the reference.


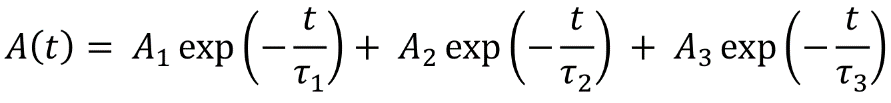


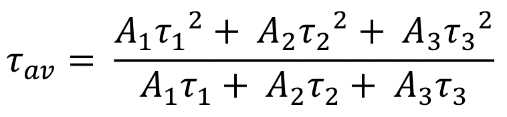


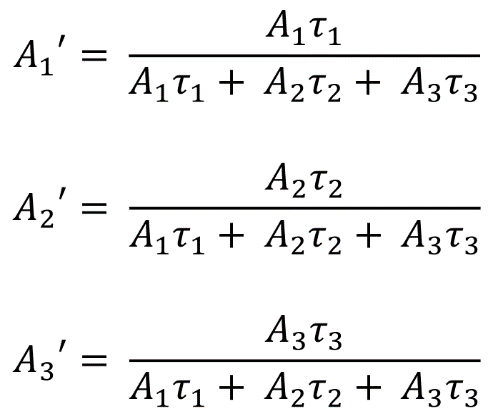


**H2O2 Detection.** The hydrogen peroxide (H2O2) content was measured using the iodometric method[1]. Specifically, 1 mL of potassium iodide solution (0.4 mol·L-1) and 1 mL of potassium hydrogen phthalate solution (0.1 mol·L-1) were mixed, followed by the addition of 0.5 mL of the centrifuged reaction supernatant to the mixture. The resulting solution was left to stand for 30 minutes to ensure that H2O2 reacted sufficiently with I⁻ under acidic conditions to form I₃⁻ (H2O2 + 3I⁻ + 2H+ → I3⁻ + 2H2O). The absorbance of I3⁻ at 350 nm was then measured using UV-visible spectroscopy, and the H2O2 content was calculated based on a standard curve.


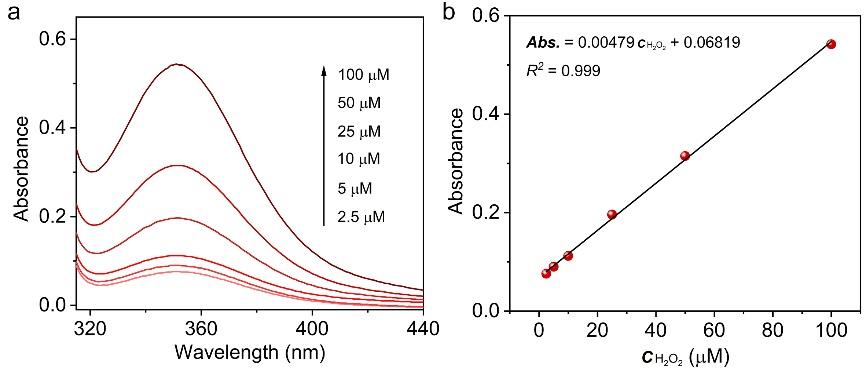


**Figure S1.** (a) The UV-Vis absorption spectra of different H2O2 concentrations, (b) The standard curve of H2O2.

**Apparent quantum yield (AQY) measurement.** The AQY of H2O2 over CsPbI3@COF-Cl was measured with irradiation light through different wavelength band pass filter (420, 450, 500, 550 and 650 nm). The photon flux of incident light was measured by a NBT 300UV photo radiometer. The AQY was calculated according to the following equation[2]:

Where Nh denotes the amount of reaction holes, Np represents the number of incident photons, NA is the Avogadro’s constant, M is the molar amount of H2O2, h refers to the Planck constant, c indicates the speed of light, P is the intensity of the irradiation, S denotes the irradiation area, λ is the irradiation wavelength and t represents the irradiation time.

**Solar-to-chemical conversion.** The solar-to-chemical conversion (SCC) efficiency was determined by a 300 W xenon lamp was used as light source and thereafter was calculated using the following equation[2]:

%

Where the free energy for H2O2 formation is 117 kJ mol−1.

**Theoretical Calculation Methods.** All density functional theory (DFT) calculations were performed using CP2K, which employs the Gaussian and plane waves (GPW) method. Periodic systems were optimized using the PBE functional and the DZVP-MOLOPT-SR-GTH pseudopotential basis set, combined with DFT-D3 (BJ) dispersion correction. Wavefunction analysis and visualization were conducted using Multiwfn and VESTA, respectively. In this study, gamma-point sampling was used, and a vacuum layer exceeding 15 Å in the z-direction was included to effectively avoid the influence of periodic boundary effects on the simulation results.

**2. Supplementary Figures**


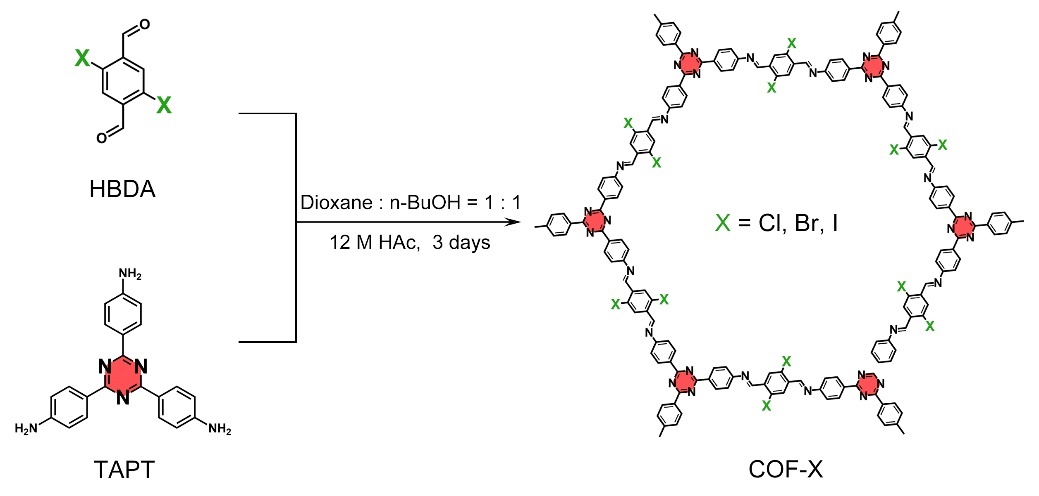


**Figure S2.** Schematic illustration of synthesis of COF-X matrixes.


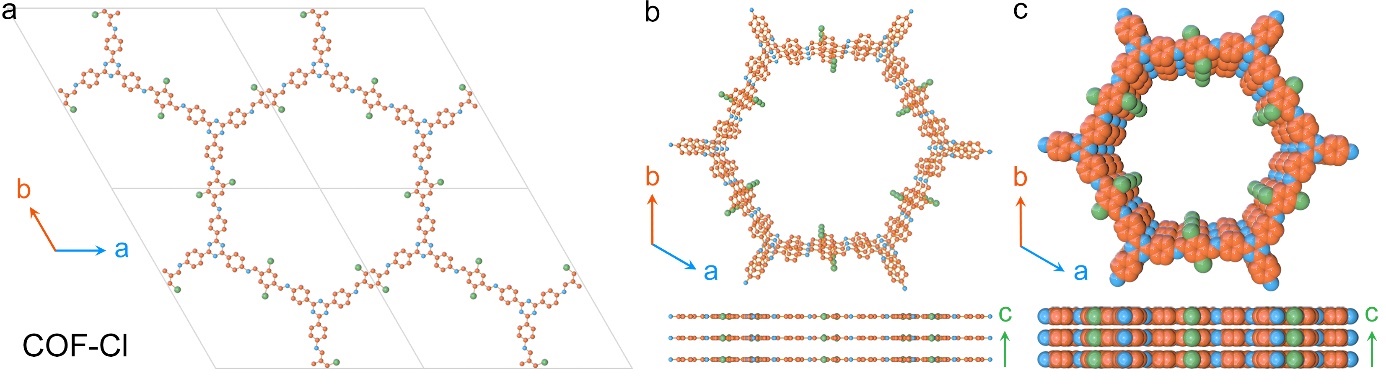


**Figure S3.** The topology network of the COF-Cl matrix.


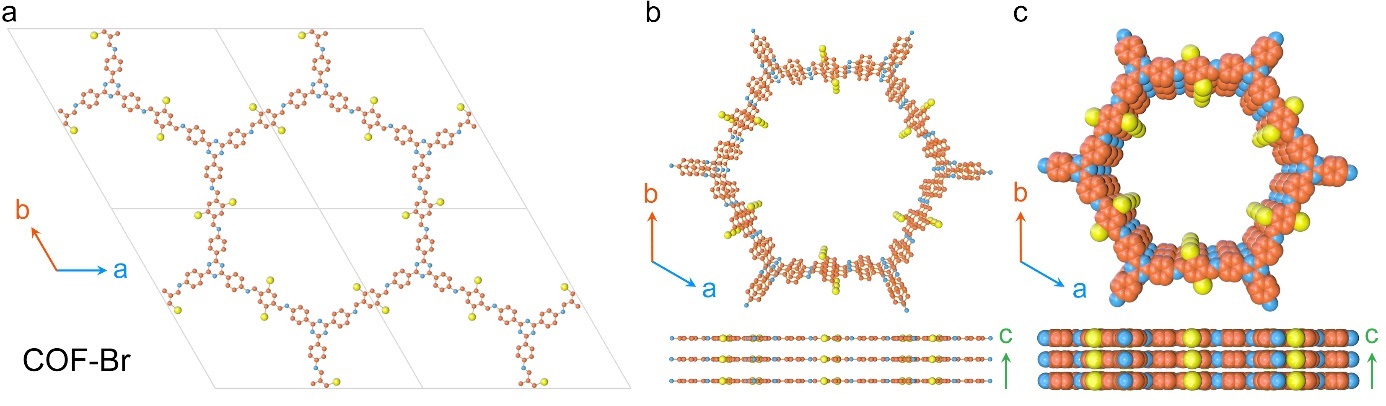


**Figure S4.** The topology network of the COF-Br matrix.


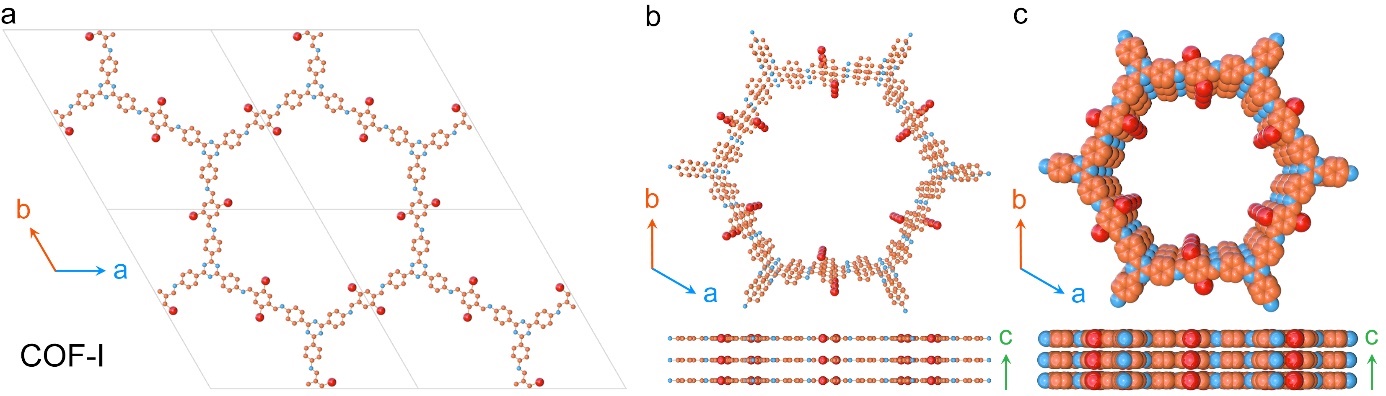


**Figure S5.** The topology network of the COF-I matrix.


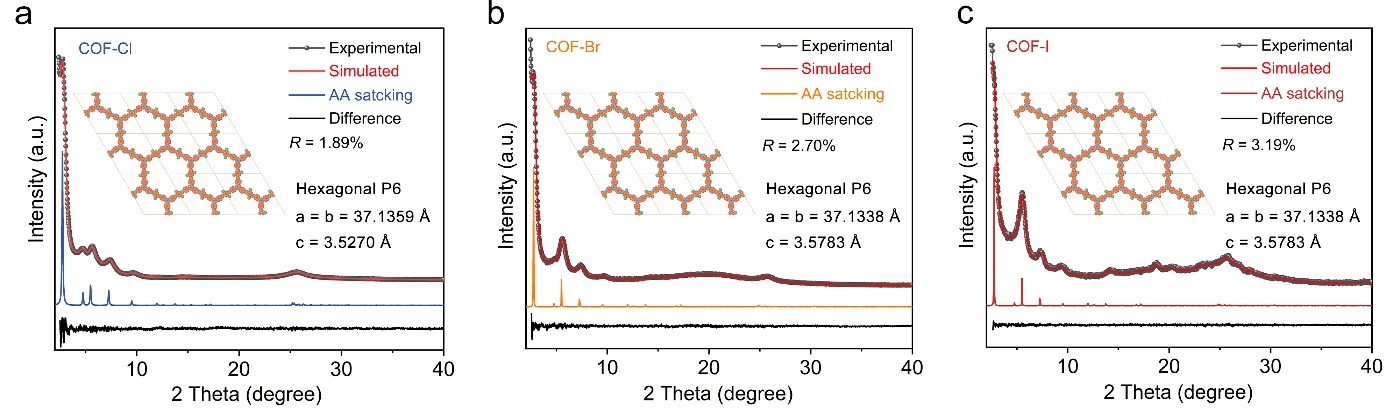


**Figure S6.** (a) Experimental (red dot) and simulated (blue line) PXRD patterns of the COF-Cl matrix. (b) Experimental (red dot) and simulated (orange line) PXRD patterns of the COF-Br matrix. (c) Experimental (red dot) and simulated (red line) PXRD patterns of the COF-I matrix. Insets are the modeled crystal structures.


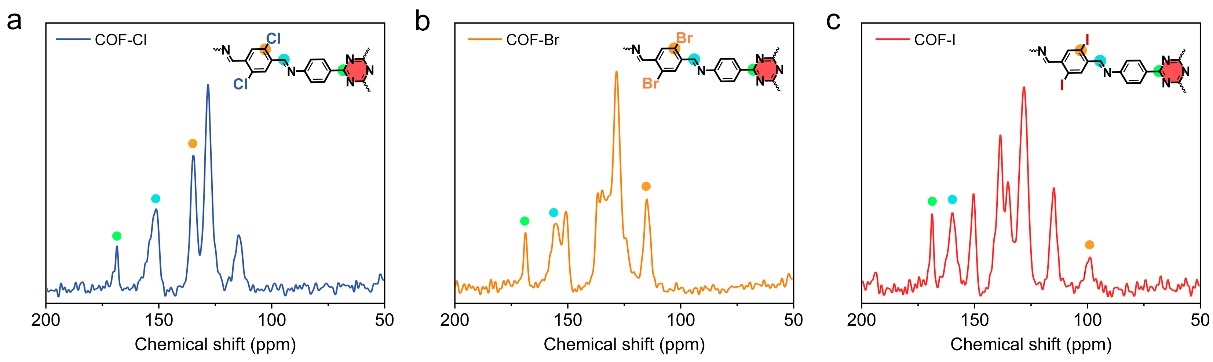


**Figure S7.** (a) 13C solid NMR spectra of COF-Cl matrixes. (a) 13C solid NMR spectra of COF-Br matrixes. (a) 13C solid NMR spectra of COF-I matrixes.


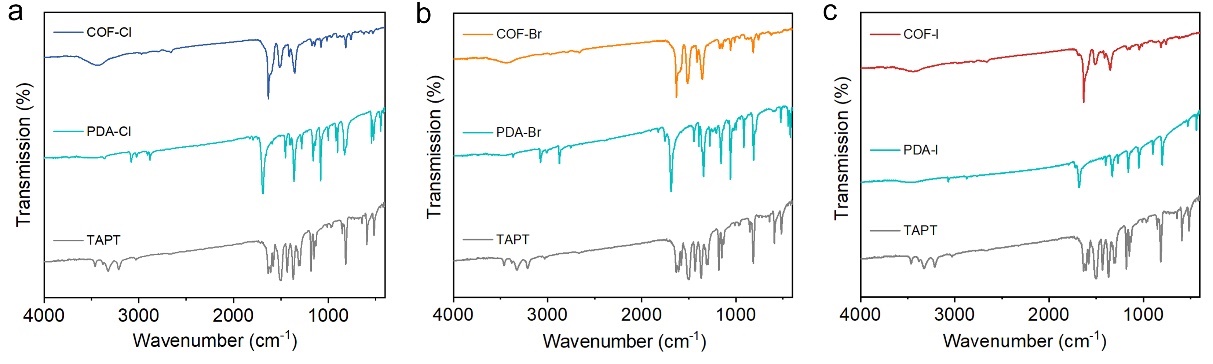


**Figure S8.** (a) The FTIR spectrum for COF-Cl matrixes. (b) The FTIR spectrum for COF-Br matrixes. (c) The FTIR spectrum for COF-I matrixes.


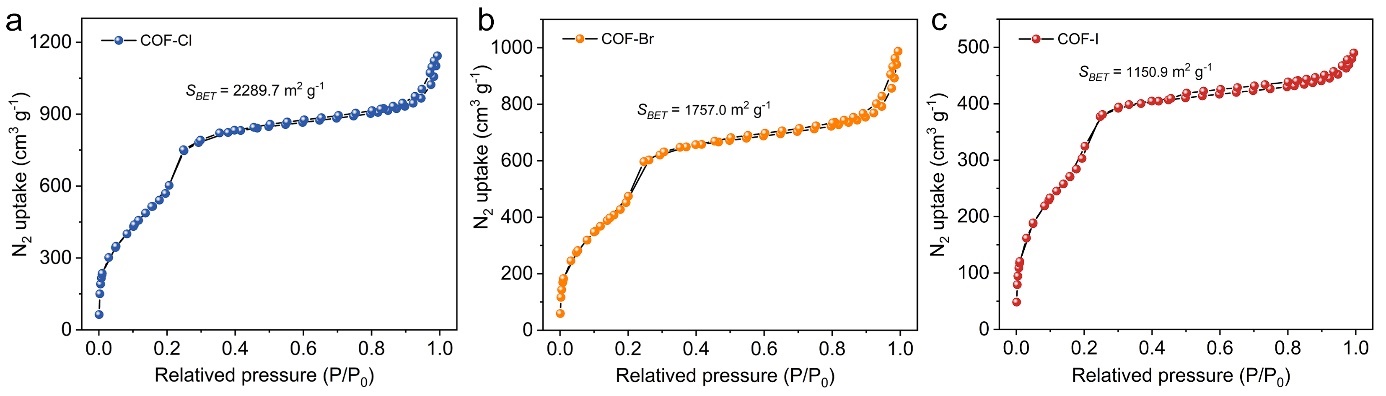


**Figure S9.** (a) N2 adsorption-desorption isotherms for COF-Cl matrixes. (b) N2 adsorption-desorption isotherms for COF-Br matrixes. (c) N2 adsorption-desorption isotherms for COF-I matrixes.


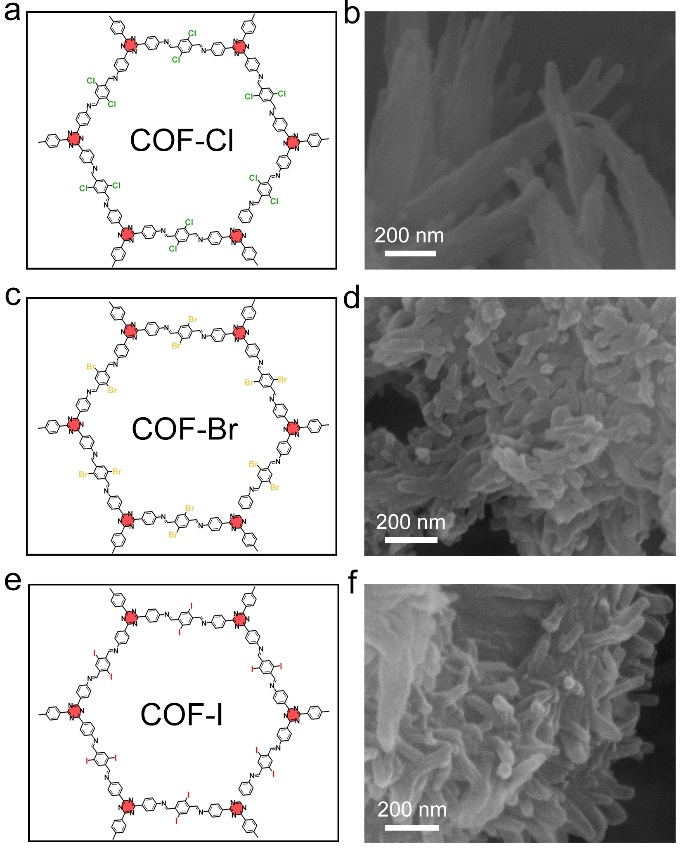


**Figure S10**. (a) The schematic structure of the COF-Cl matrix. (b) The SEM image of the COF-Cl matrix. (c) The schematic structure of the COF-Br matrix. (d) The SEM image of the COF-Br matrix. (e) The schematic structure of the COF-I matrix. (f) The SEM image of the COF-I matrix.


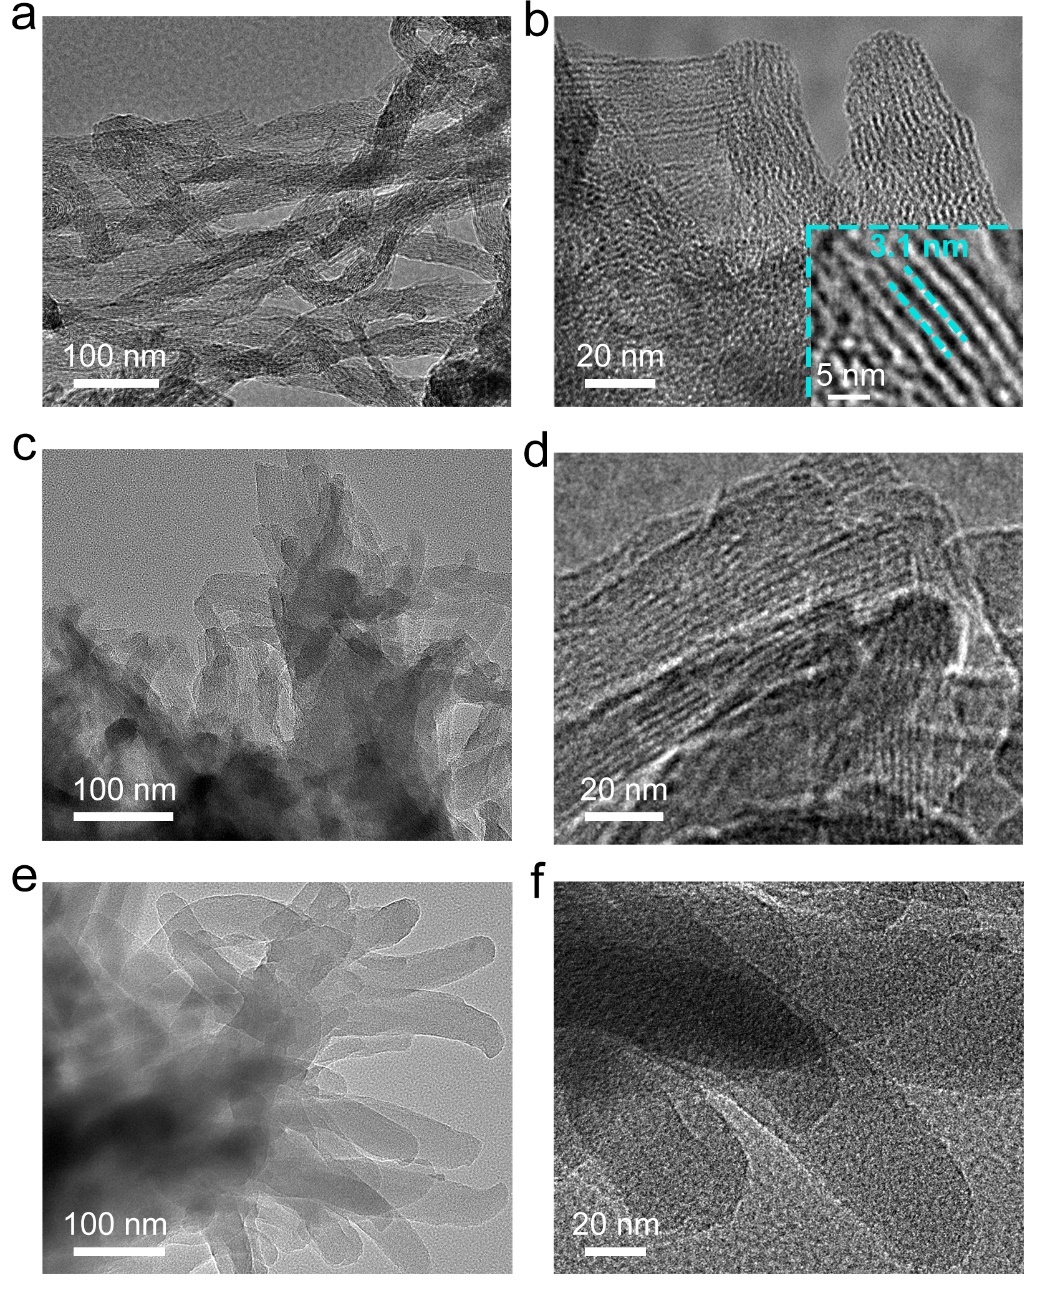


**Figure S11.** (a, b) The TEM image of the COF-Cl matrix. the inset is the high-resolution TEM image of the selected area. (c, d) The TEM image of the COF-Br matrix. (e, f) The TEM image of the COF-I matrix.


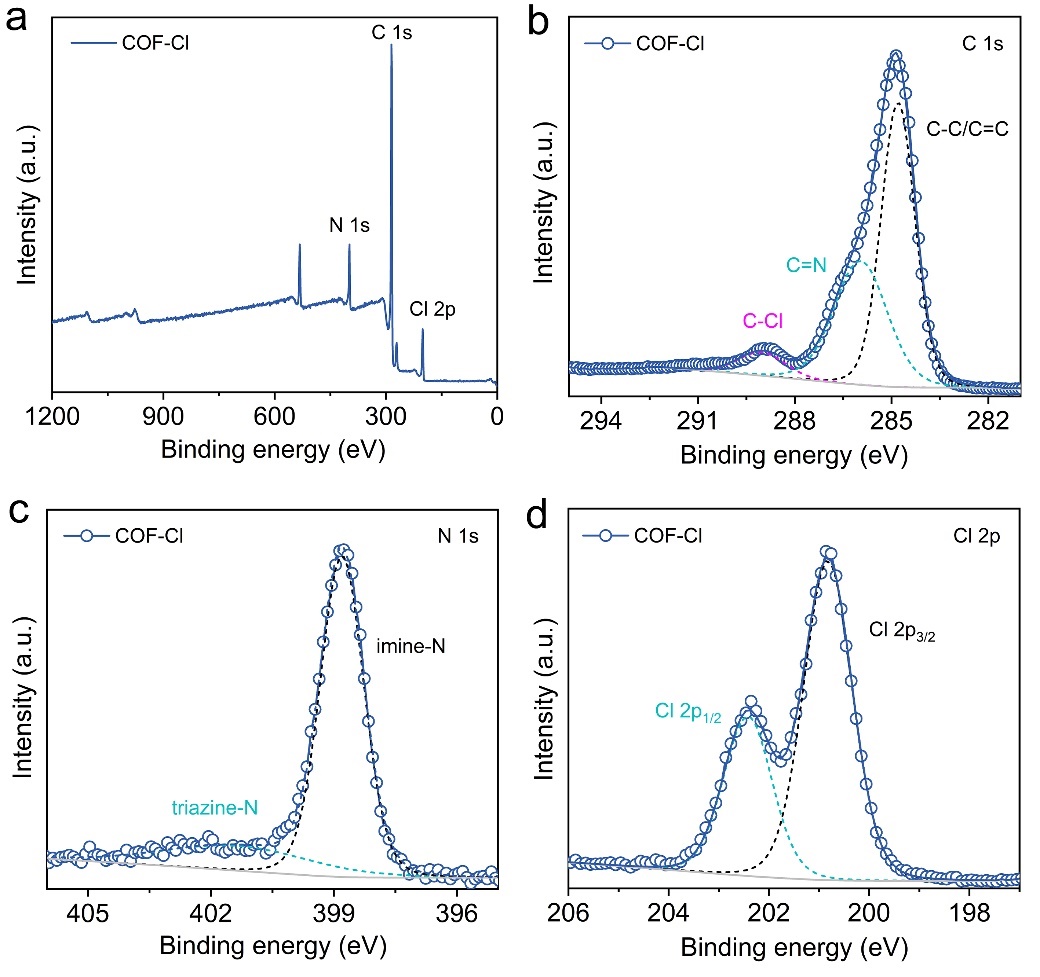


**Figure S12**. (a) The survey XPS spectra of COF-Cl matrix. (b) XPS high-resolution scans for C 1s. (c) XPS high-resolution scans for N 1s. (d) XPS high-resolution scans for Cl 2p.


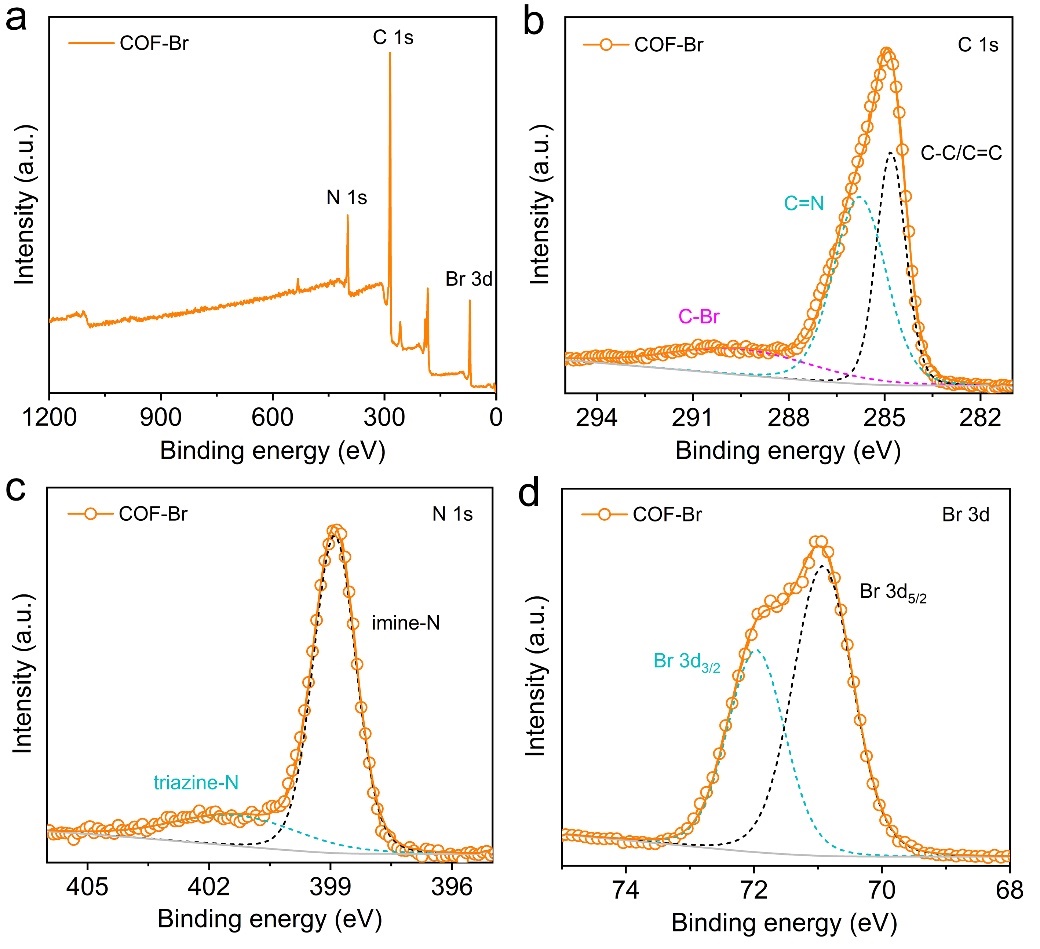


**Figure S13.** (a) The survey XPS spectra of COF-Br matrix. (b) XPS high-resolution scans for C 1s. (c) XPS high-resolution scans for N 1s. (d) XPS high-resolution scans for Br 3d.


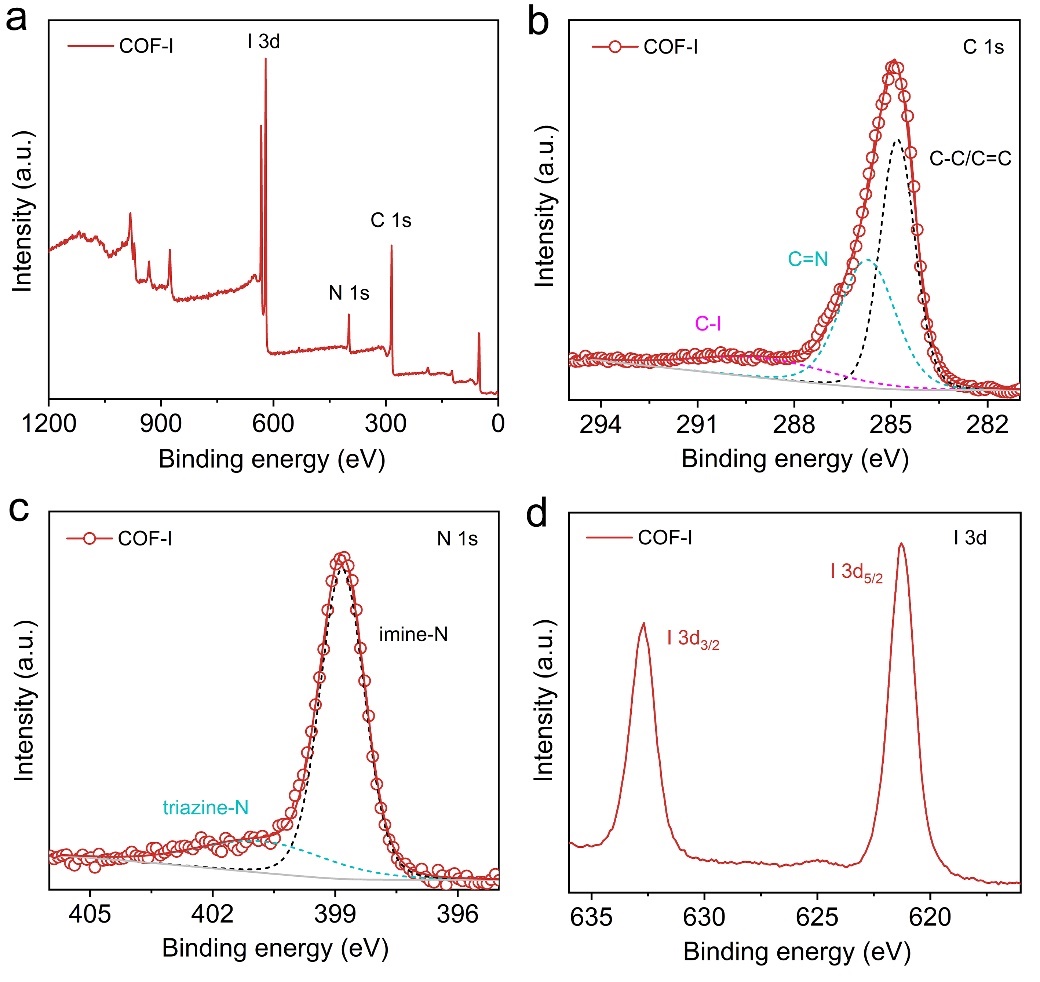


**Figure S14.** (a) The survey XPS spectra of COF-I matrix. (b) XPS high-resolution scans for C 1s. (c) XPS high-resolution scans for N 1s. (d) XPS high-resolution scans for I 3d.


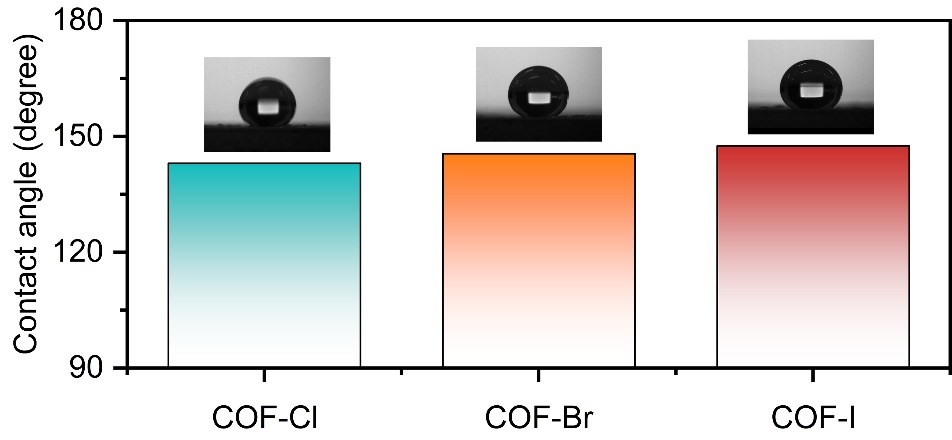


**Figure S15.** The water contact angle of the COF-X matries.


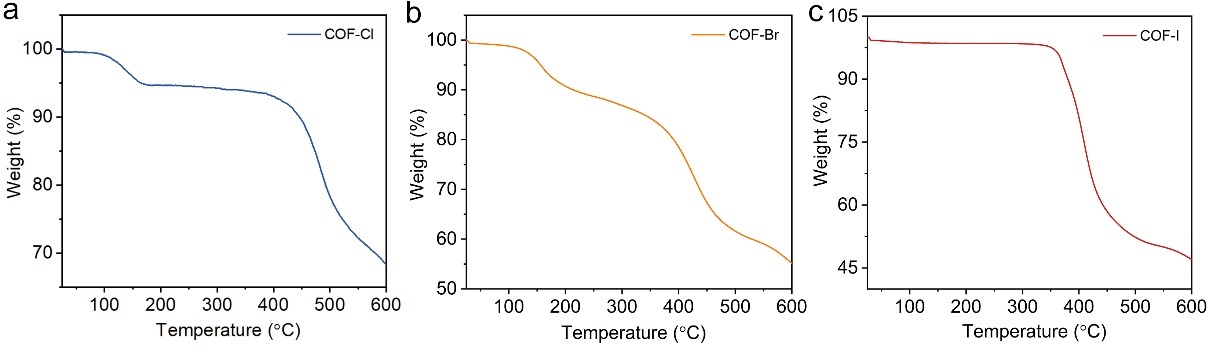


**Figure S16.** Thermo gravimetric analysis (TGA) of COF-Cl matrix (a), COF-Br matrix (b) and COF-I (c).


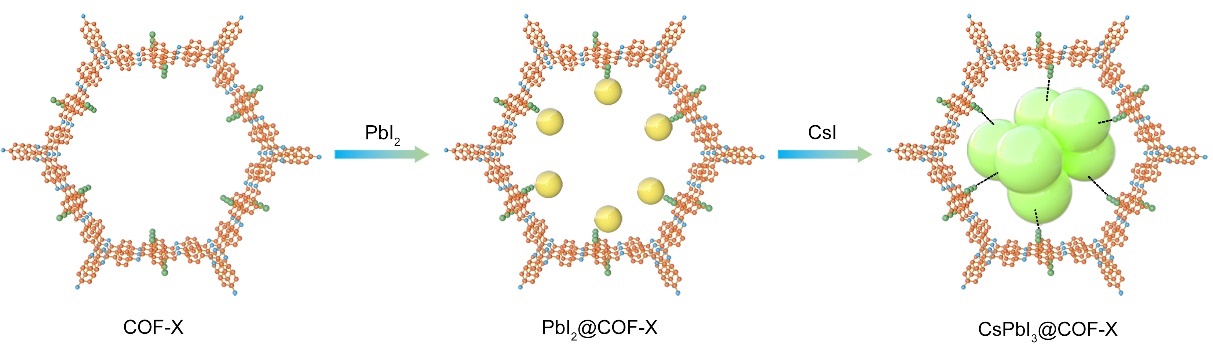


**Figure S17.** The synthetic route of the CsPbI3@COF-Cl system.


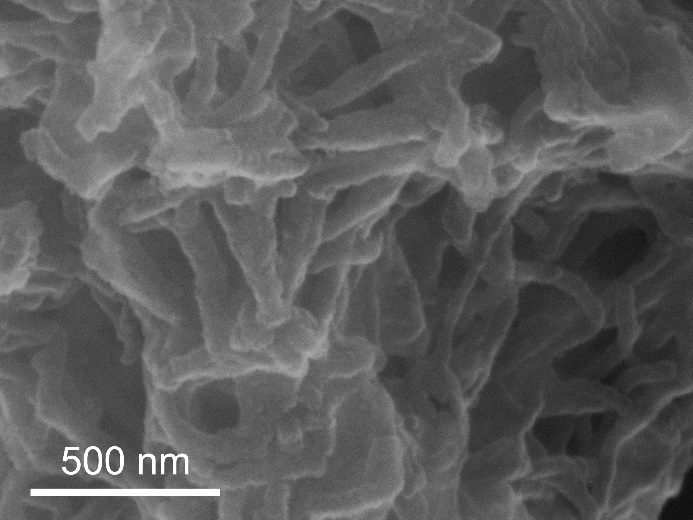


**Figure S18.** The SEM image of the CsPbI3@COF-Cl system.


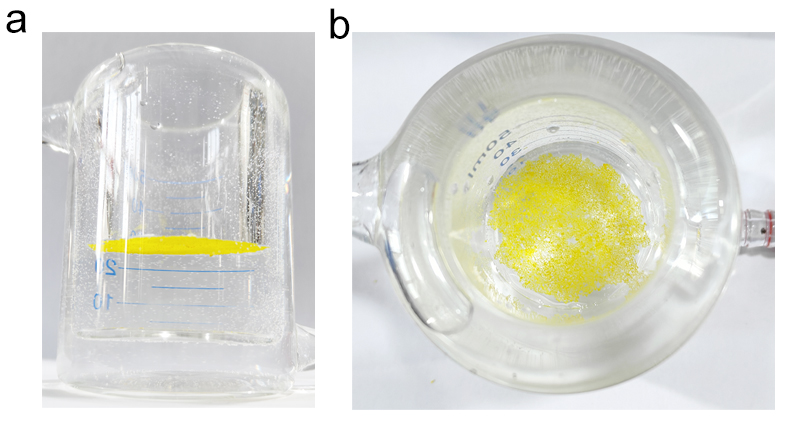


**Figure S19.** Photographs of the floating triple-phase interfacial catalyst.


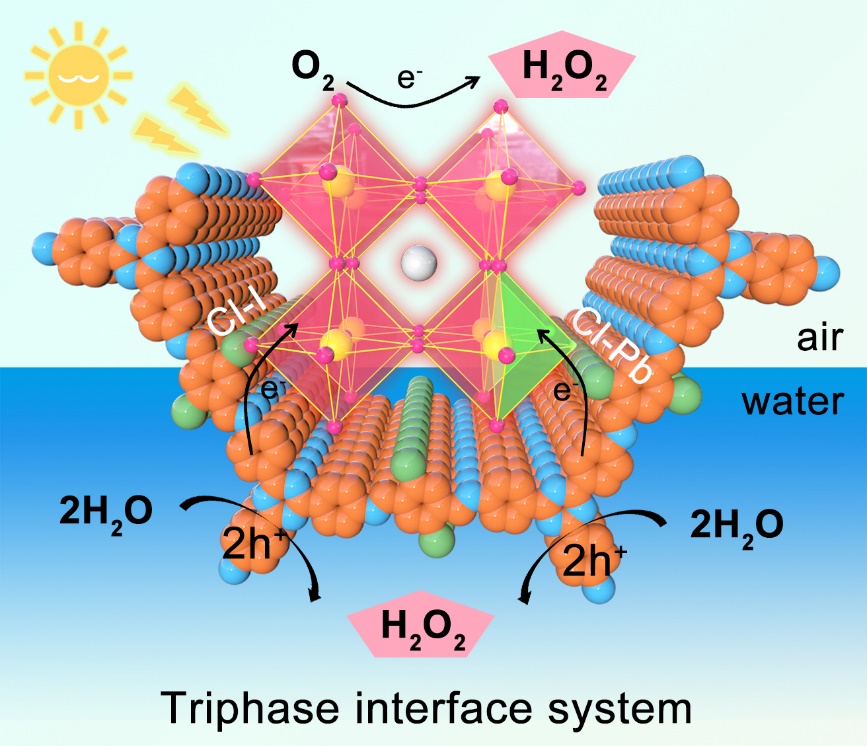


**Figure S20.** Schematic illustration of the CsPbI3@COF-Cl system for photocatalytic H2O2 production at the triple-phase interface.


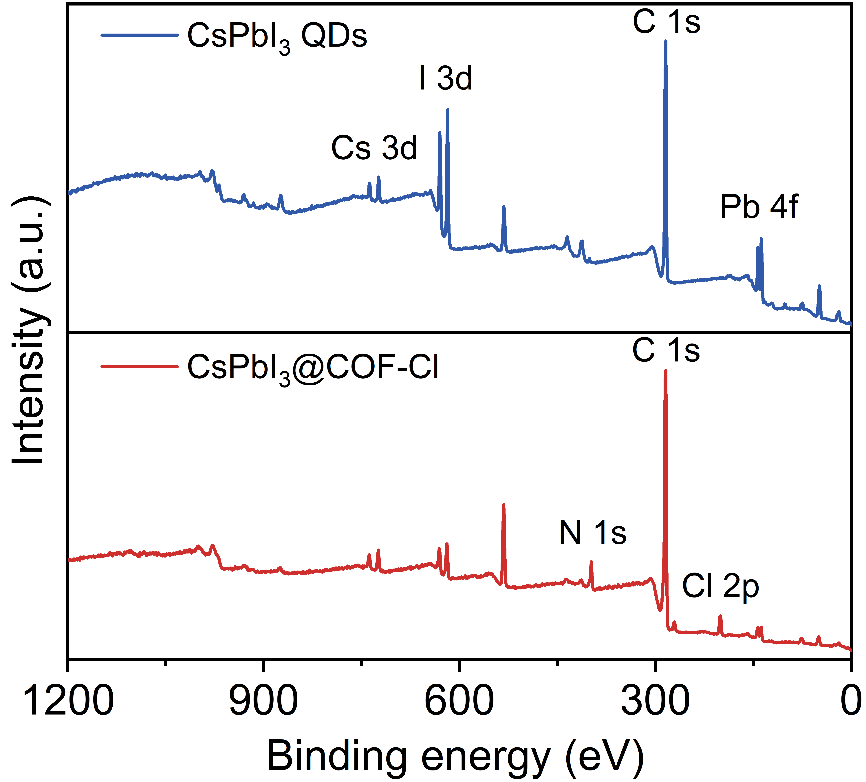


**Figure S21.** The survey XPS spectra of CsPbI3 QDs and CsPbI3@COF-Cl system.


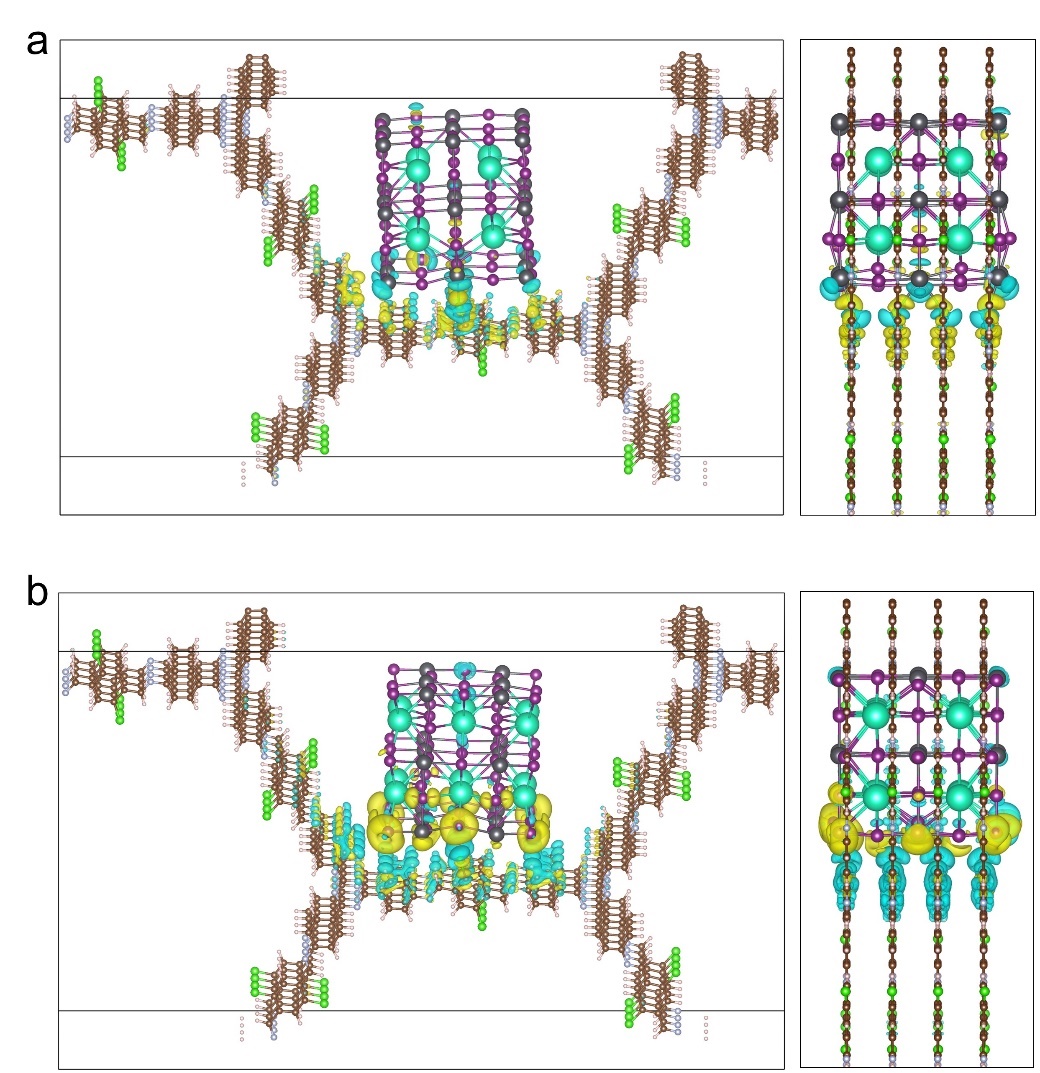


**Figure S22.** (a) Differential charge density map illustrating the passivation of adjacent defects between COF-Cl matrix and lead-rich CsPbI3 perovskite surface (left: front view; right: side view). (b) Differential charge density map showing neighboring defect passivation at COF-Cl/CsPbI3 perovskite iodine-rich interface.


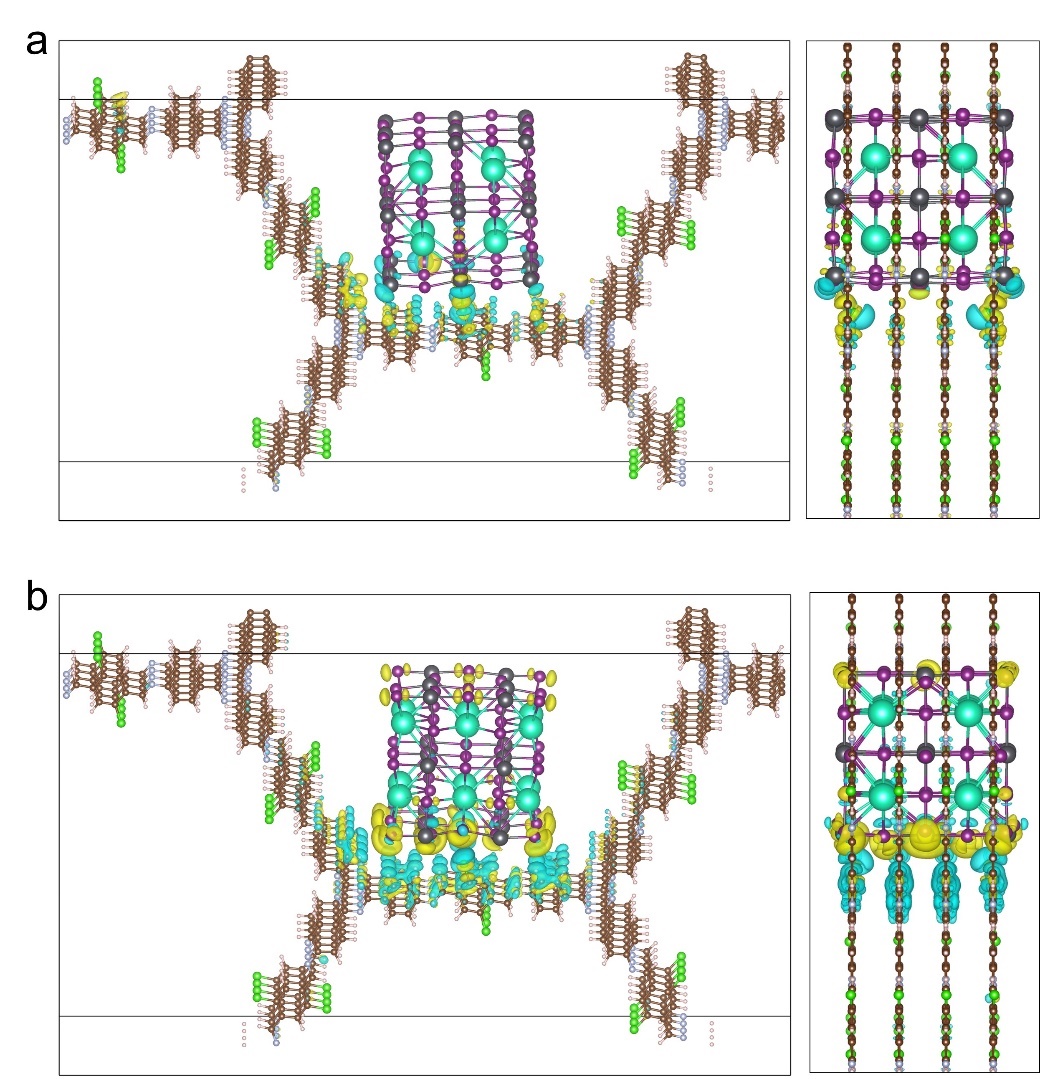


**Figure S23.** (a) Atomic structure demonstrating meta-position defect passivation between CsPbI3 perovskite lead-rich surface and COF-Cl matrix with partial Cl functional group removal. (b) Atomic configuration of meta-defect passivation between iodine-rich CsPbI3 perovskite surface and partially Cl-depleted COF-Cl matrix.


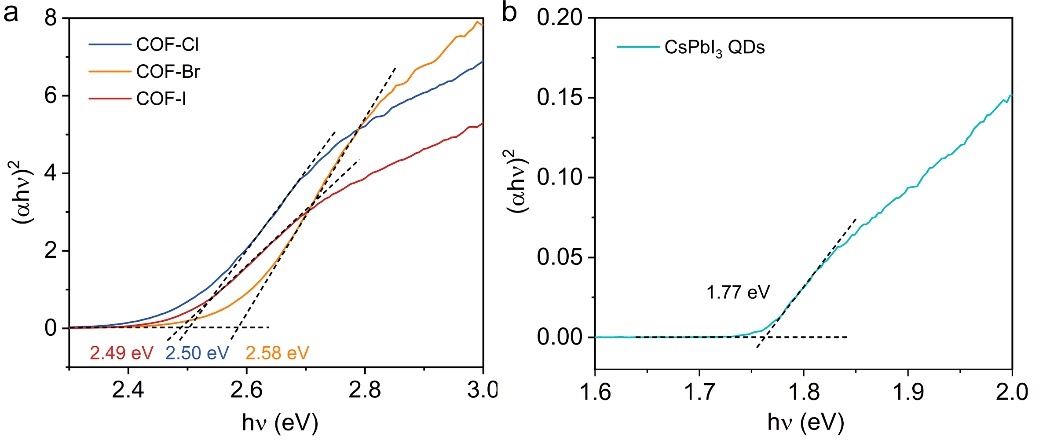


**Figure S24.** (a) Tauc-plots and band gap energies of COF-X matrix. (a) The Tauc-plot and band gap energy of CsPbI3 QDs.


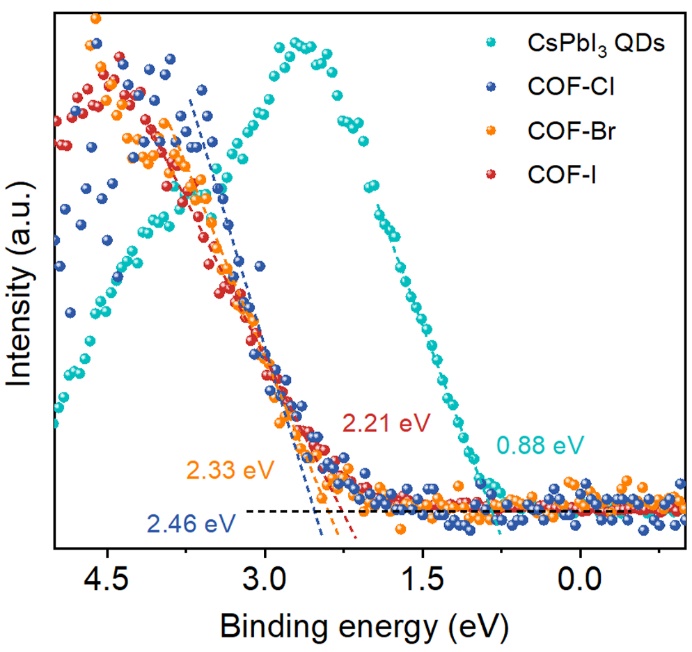


**Figure S25.** VB XPS spectra of CsPbI3 QDs and COF-X matrix.


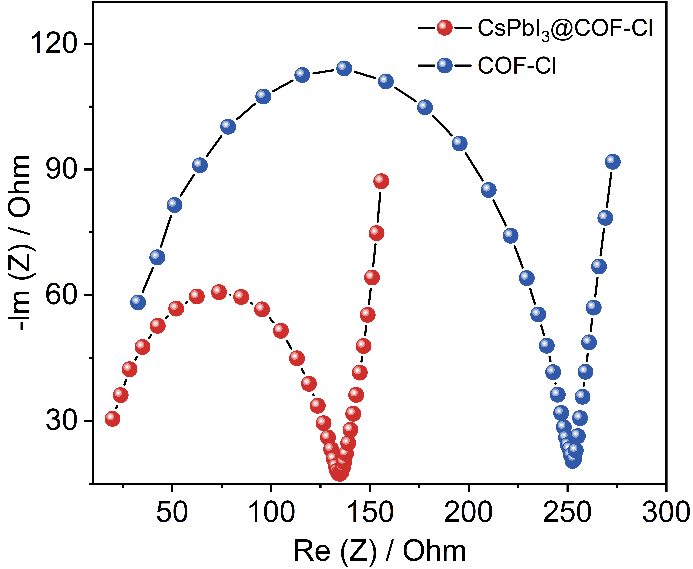


**Figure S26.** EIS curves of COF-Cl matrix and CsPbI3@COF-Cl system.


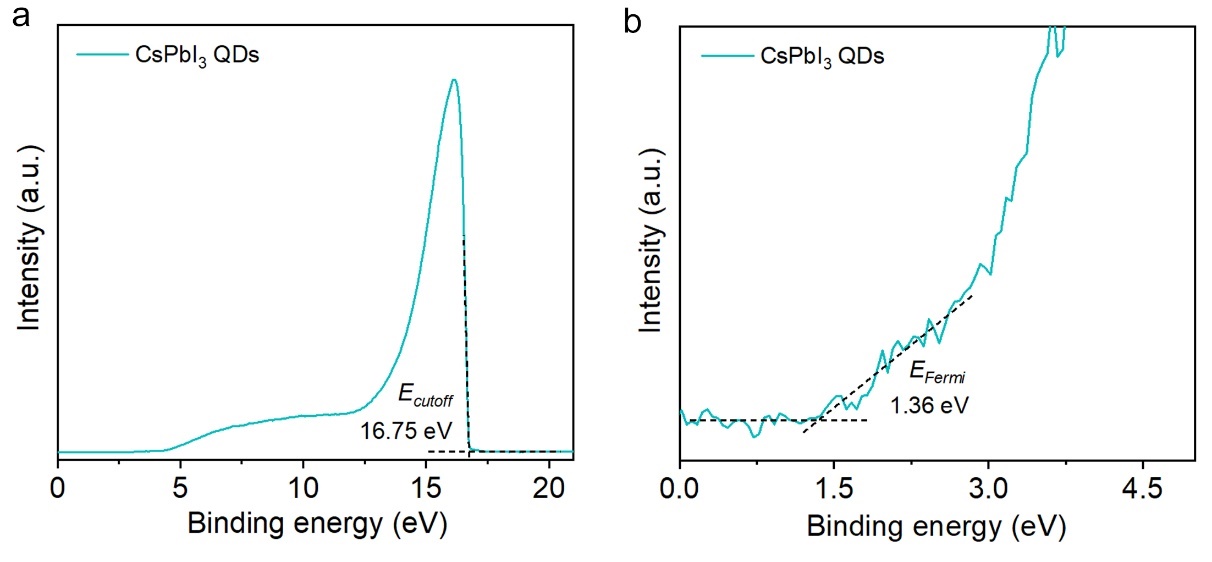


**Figure S27.** UPS spectrum of CsPbI3 QDs.


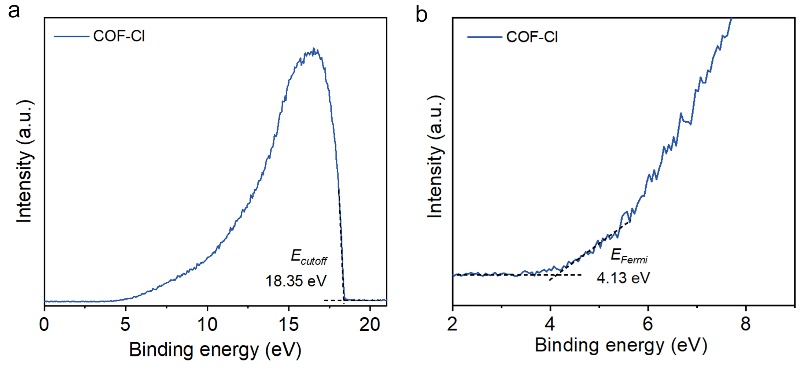


**Figure S28.** UPS spectrum of COF-Cl matrix.


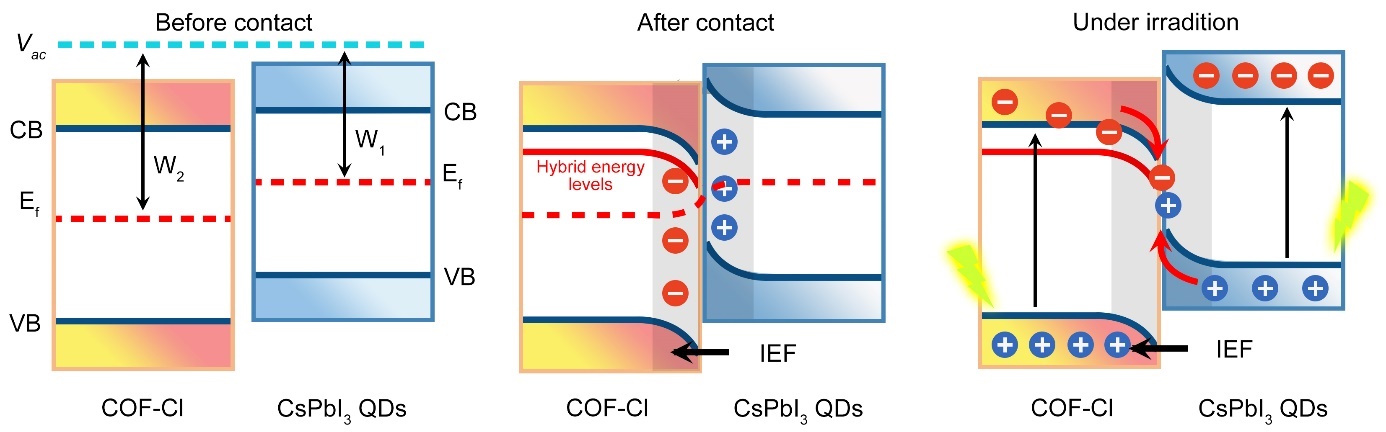


**Figure S29.** Mechanism diagram of photogenerated electron transfer at the interface of S-scheme CsPbI3@COF-Cl system.


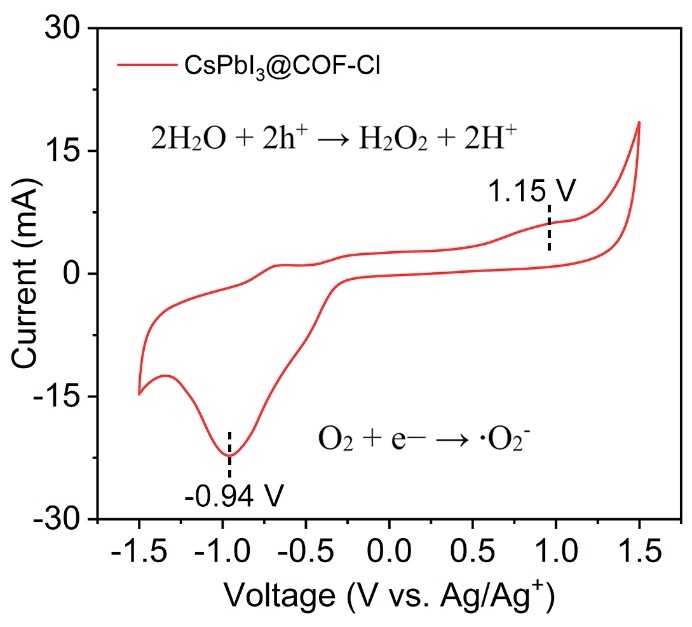


**Figure S30.** The CV curve of CsPbI3@COF-Cl system.

**
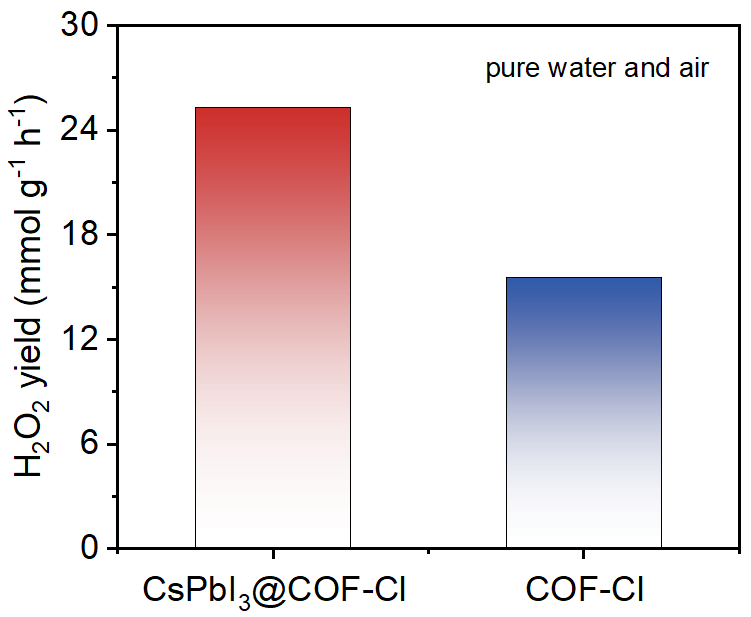
**

**Figure S31.** The photosynthesis rates by the COF-Cl matrix and CsPbI3@COF-Cl system under pure water and air conditions.

**
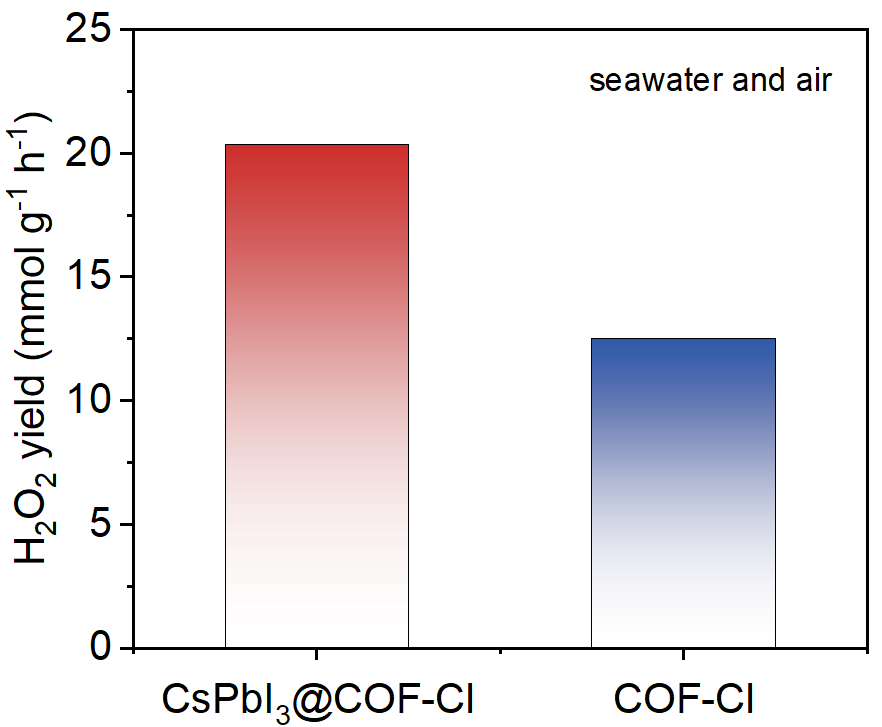
**

**Figure S32.** The photosynthesis rates by the COF-Cl matrix and CsPbI3@COF-Cl system under seawater and air conditions.


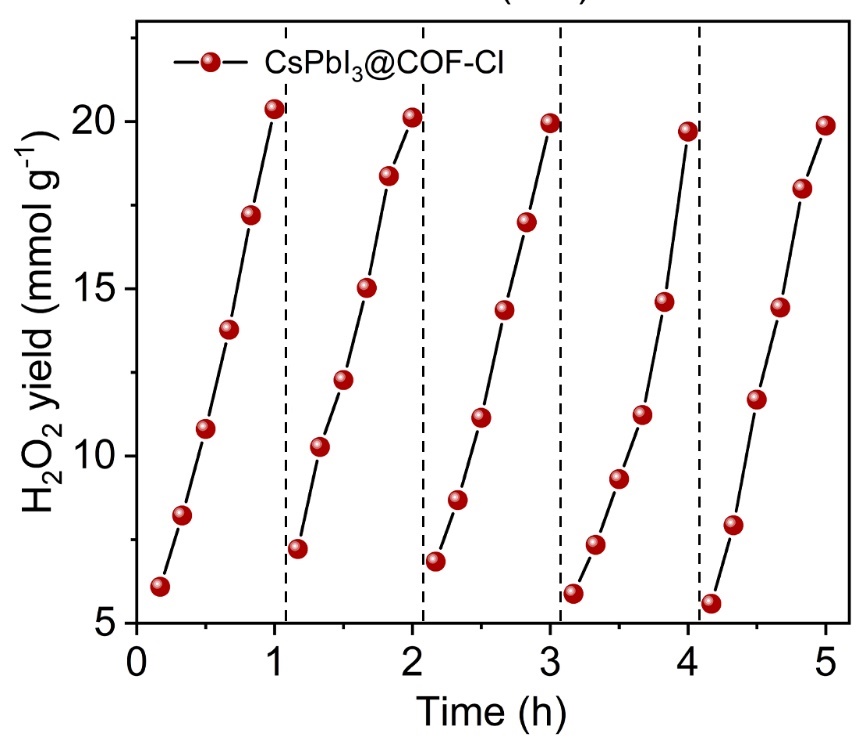


**Figure S33.** Cycling performance of CsPbI3@COF-Cl system for H2O2 production.

**
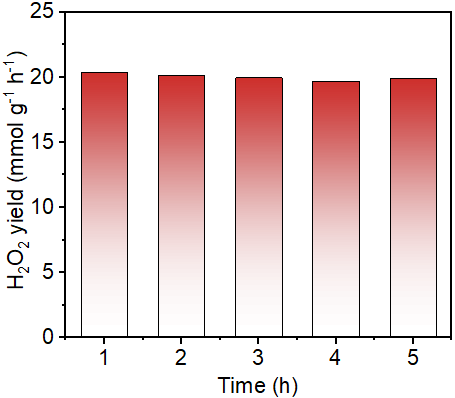
**

**Figure S34.** The cycling photosynthesis rates by the CsPbI3@COF-Cl system under seawater and air conditions.


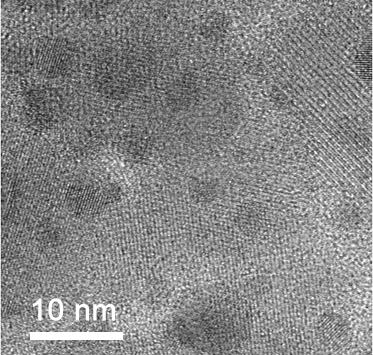


**Figure S35.** The TEM image CsPbI3@COF-Cl system after five cycle tests in seawater.


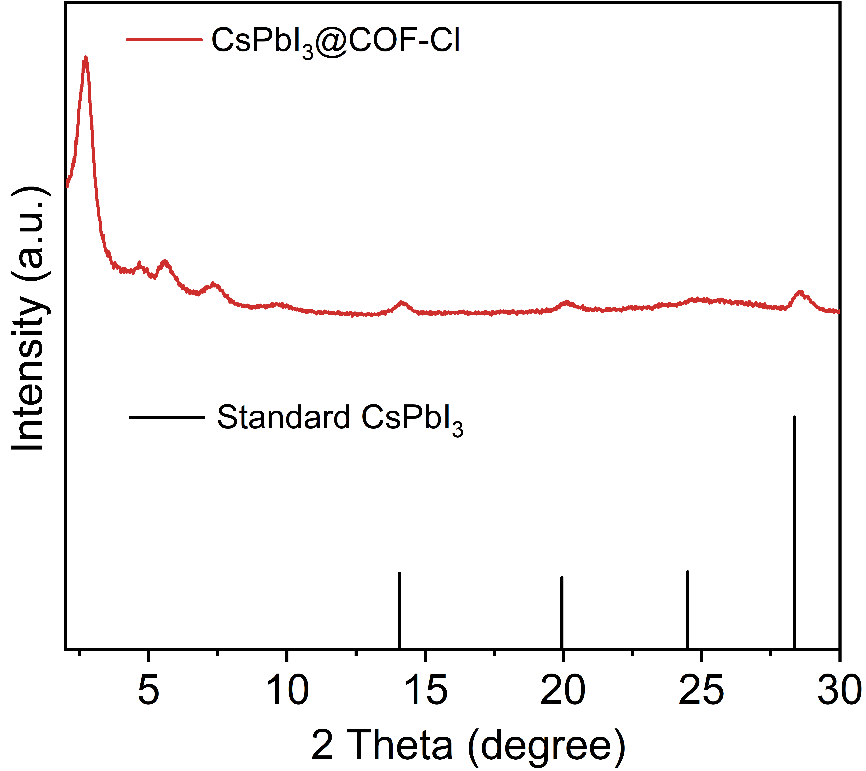


**Figure S36.** The XRD pattern of CsPbI3@COF-Cl system after five cycle tests in seawater.

**
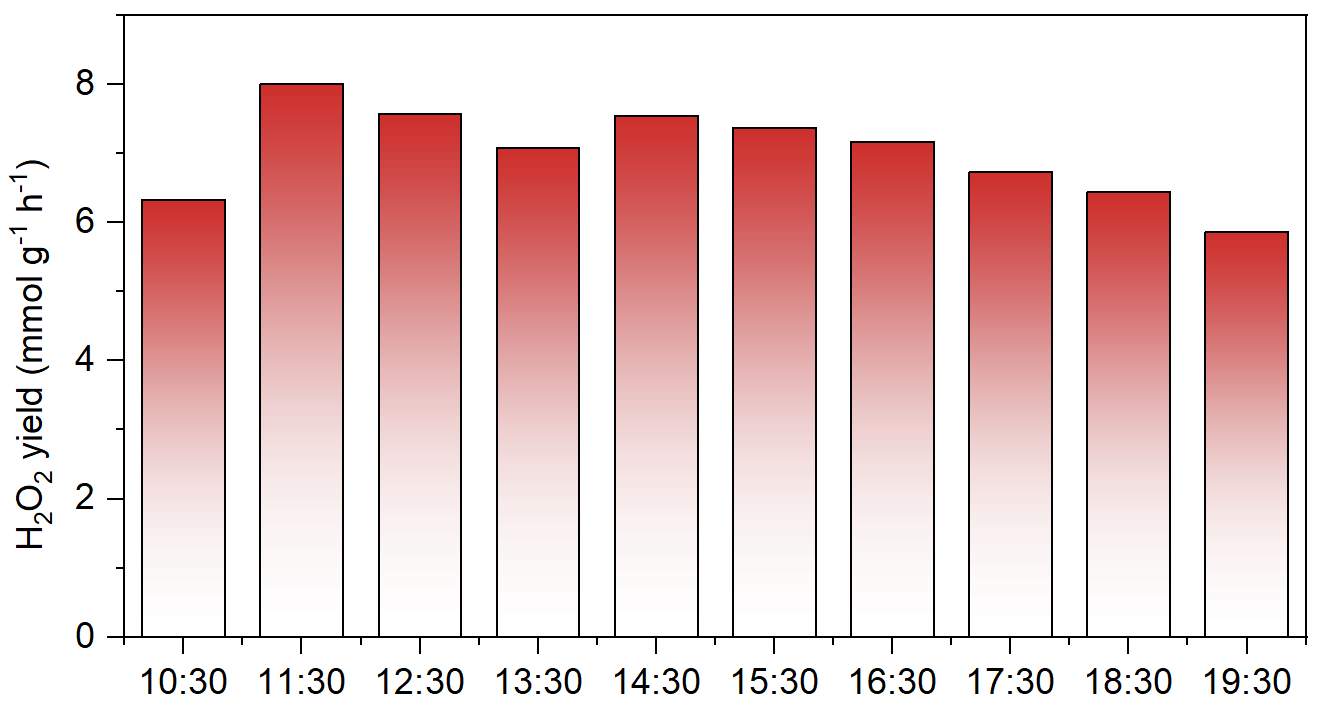
**

**Figure S37.** The H2O2 photosynthesis rates, system temperatures and light intensities of HDPC at different time in outdoor experiment.

**3. Supplementary Tables**

**Table S1.** The crystallographic parameters of COF-X (X = Cl, Br and I) matrixes.

| Sample | a (Å) | b (Å) | c (Å) | N-N（Å） | X-X（Å） |
| --- | --- | --- | --- | --- | --- |
| COF-Cl | 37.135900 | 37.135900 | 3.670495 | 40.1283 | 31.2480 |
| COF-Br | 36.977100 | 36.977100 | 3.746085 | 39.9460 | 30.7207 |
| COF-I | 36.973900 | 36.973900 | 3.957944 | 39.9380 | 30.2872 |

**Table S2.** Specific surface areas calculated with BET method.

| Sample | Specific Surface Area (m2 g-1) | Pore volume (m3 g-1) | Pore size (nm) |
| --- | --- | --- | --- |
| COF-Cl | 2289.7 | 1.77 | 3.09 |
| COF-Br | 1757.0 | 1.53 | 3.23 |
| COF-I | 1150.9 | 0.76 | 2.63 |
| CsPbI3@COF-Cl | 1318.1 | 1.05 | - |

**Table S3.** Fluorescence lifetimes of CsPbBr3 QDs and CsPbI3@COF-Cl.

| Sample | τ1 (ns) | Rel (%) | τ2 (ns) | Rel (%) | τ3(ns) | Rel (%) | τav (ns) |
| --- | --- | --- | --- | --- | --- | --- | --- |
| CsPbBr3 QDs | 3.13 | 20.80 | 13.68 | 51.45 | 62.22 | 27.75 | 24.96 |
| CsPbI3@COF-Cl | 9.60 | 7.86 | 57.52 | 40.12 | 289.41 | 52.02 | 174.38 |

**Table S4.** Comparison of performance with reported photocatalysts.

| **Catalysts** | **H2O2 yield**  **(mmol h-1 g-1)**  **In pure water** | **H2O2 yield**  **(mmol h-1 g-1) in seawater** | **AQY (%)** | **SCC (%)** | **Ref.** |
| --- | --- | --- | --- | --- | --- |
| CsPbI3@COF-Cl | 25.29 | 20.37 | 15.76 | 1.38 | This work |
| COF-BD2 | 5.21 | 3.99 | 18.4 | 0.68 | 3 |
| NQPD-3 | 3.06 | 3.56 | 12.8 | 0.27 | 4 |
| TBA-COF | - | 8.88 | 9.56 | 0.62 | 5 |
| 2, 5-DhaTph | - | 1.50 | 0.15 | - | 6 |
| COF PTTN-AO | 6.02 | 3.00 | - | 0.61 | 7 |
| TAPT-2KtTb Pd COF | 3.23 | 2.68 | 9.5 | 1.39 | 8 |
| TPB-COF | 7.87 | 5.70 | 6.89 | 0.3 | 9 |
| UP-TP | - | 3.85 | 4.52 | 0.24 | 10 |
| TD-COF | 4.06 | 3.36 | - | 0.15 | 11 |
| DT2TA-TAPB | 8.59 | - | 3.3 | - | 12 |
| SSPM | 7.70 | - | - | - | 13 |
| Re10-MFM-67 | 8.50 | - | - | - | 14 |

**Table S5.** Fractional atomic coordinates and the unit cell of COF-Cl.

| space group: *P6/m* | | | | |
| --- | --- | --- | --- | --- |
| α = 90.000°, β = 90.000°, γ = 120.000°  a = 37.135900 Å, b = 37.135900 Å, c = 3.670495 Å | | | | |
| Atom | x | y | z | Occupancy |
| H | 0.43928 | 0.75528 | 0.49835 | 1 |
| H | 0.48151 | 0.83333 | 0.4991 | 1 |
| H | 0.36856 | 0.83902 | 0.50018 | 1 |
| H | 0.32743 | 0.76227 | 0.50041 | 1 |
| H | 0.40934 | 0.90184 | 0.49579 | 1 |
| H | 0.47451 | 0.05028 | 0.50543 | 1 |
| N | 0.31376 | 0.68992 | 0.50018 | 1 |
| C | 0.29237 | 0.64795 | 0.50049 | 1 |
| C | 0.38058 | 0.75367 | 0.49928 | 1 |
| C | 0.22196 | 0.58321 | 0.50018 | 1 |
| C | 0.17878 | 0.56342 | 0.50018 | 1 |
| C | 0.15818 | 0.58679 | 0.50042 | 1 |
| C | 0.1828 | 0.63056 | 0.50064 | 1 |
| C | 0.22601 | 0.65033 | 0.50085 | 1 |
| N | 0.45585 | 0.88506 | 0.50018 | 1 |
| C | 0.46881 | 0.55759 | 0.49805 | 1 |
| C | 0.48485 | 0.52874 | 0.49935 | 1 |
| C | 0.52803 | 0.54249 | 0.50018 | 1 |
| C | 0.5426 | 0.51456 | 0.50068 | 1 |
| Cl | 0.40448 | 0.96925 | 0.50404 | 1 |
| H | 0.684 | 0.43922 | 0.50018 | 1 |
| H | 0.24474 | 0.68406 | 0.50072 | 1 |
| H | 0.56072 | 0.2447 | 0.50139 | 1 |
| H | 0.31599 | 0.56077 | 0.50127 | 1 |
| H | 0.75528 | 0.31596 | 0.50387 | 1 |
| H | 0.64828 | 0.48146 | 0.49984 | 1 |
| H | 0.1668 | 0.64835 | 0.50018 | 1 |
| H | 0.51851 | 0.16667 | 0.50213 | 1 |
| H | 0.3517 | 0.51853 | 0.50157 | 1 |
| H | 0.83322 | 0.35168 | 0.50079 | 1 |
| H | 0.52955 | 0.36851 | 0.50314 | 1 |
| H | 0.16102 | 0.52961 | 0.49867 | 1 |
| H | 0.63144 | 0.16097 | 0.48979 | 1 |
| H | 0.47044 | 0.63148 | 0.49825 | 1 |
| H | 0.83899 | 0.4704 | 0.49103 | 1 |
| H | 0.56516 | 0.32738 | 0.50271 | 1 |
| H | 0.23776 | 0.56523 | 0.49971 | 1 |
| H | 0.67258 | 0.23771 | 0.49181 | 1 |
| H | 0.43483 | 0.67261 | 0.49734 | 1 |
| H | 0.76224 | 0.43478 | 0.49554 | 1 |
| H | 0.5075 | 0.40933 | 0.49932 | 1 |
| H | 0.09819 | 0.50757 | 0.50707 | 1 |
| H | 0.59067 | 0.09816 | 0.51061 | 1 |
| H | 0.49248 | 0.59066 | 0.49531 | 1 |
| H | 0.90181 | 0.49241 | 0.5231 | 1 |
| H | 0.42421 | 0.47446 | 0.49868 | 1 |
| H | 0.94978 | 0.42423 | 0.50087 | 1 |
| H | 0.5255 | 0.94972 | 0.49724 | 1 |
| H | 0.57577 | 0.52552 | 0.50137 | 1 |
| H | 0.05022 | 0.57579 | 0.49744 | 1 |
| N | 0.62387 | 0.31371 | 0.50018 | 1 |
| N | 0.31012 | 0.62391 | 0.50018 | 1 |
| N | 0.68625 | 0.31008 | 0.49979 | 1 |
| N | 0.37613 | 0.68628 | 0.49959 | 1 |
| N | 0.68987 | 0.37609 | 0.49993 | 1 |
| C | 0.64446 | 0.29233 | 0.49989 | 1 |
| C | 0.3521 | 0.6445 | 0.49948 | 1 |
| C | 0.70763 | 0.35206 | 0.49981 | 1 |
| C | 0.35555 | 0.70767 | 0.49967 | 1 |
| C | 0.6479 | 0.3555 | 0.5004 | 1 |
| C | 0.62692 | 0.38052 | 0.50078 | 1 |
| C | 0.24636 | 0.62698 | 0.50086 | 1 |
| C | 0.61943 | 0.24633 | 0.49897 | 1 |
| C | 0.37307 | 0.61946 | 0.49882 | 1 |
| C | 0.75364 | 0.37303 | 0.49971 | 1 |
| C | 0.6388 | 0.22192 | 0.49499 | 1 |
| C | 0.41684 | 0.63883 | 0.49784 | 1 |
| C | 0.77804 | 0.4168 | 0.49667 | 1 |
| C | 0.36122 | 0.77807 | 0.49973 | 1 |
| C | 0.58315 | 0.36116 | 0.50172 | 1 |
| C | 0.61541 | 0.17874 | 0.49445 | 1 |
| C | 0.43663 | 0.61544 | 0.49802 | 1 |
| C | 0.82122 | 0.4366 | 0.49489 | 1 |
| C | 0.3846 | 0.82125 | 0.49965 | 1 |
| C | 0.56335 | 0.38455 | 0.50183 | 1 |
| C | 0.57145 | 0.15816 | 0.4989 | 1 |
| C | 0.41326 | 0.57147 | 0.49895 | 1 |
| C | 0.84182 | 0.41324 | 0.49738 | 1 |
| C | 0.42856 | 0.84184 | 0.49939 | 1 |
| C | 0.58672 | 0.42851 | 0.50086 | 1 |
| C | 0.5523 | 0.18278 | 0.50091 | 1 |
| C | 0.36949 | 0.55233 | 0.50018 | 1 |
| C | 0.81721 | 0.36947 | 0.49991 | 1 |
| C | 0.44771 | 0.81722 | 0.49902 | 1 |
| C | 0.63049 | 0.44765 | 0.50018 | 1 |
| C | 0.57572 | 0.22597 | 0.50073 | 1 |
| C | 0.34971 | 0.57576 | 0.50018 | 1 |
| C | 0.77401 | 0.34968 | 0.50152 | 1 |
| C | 0.42429 | 0.77402 | 0.49874 | 1 |
| C | 0.65027 | 0.42423 | 0.5004 | 1 |
| N | 0.5708 | 0.45582 | 0.50068 | 1 |
| N | 0.11495 | 0.57085 | 0.49922 | 1 |
| N | 0.54416 | 0.11494 | 0.49947 | 1 |
| N | 0.42919 | 0.54417 | 0.49994 | 1 |
| N | 0.88505 | 0.42919 | 0.49534 | 1 |
| C | 0.91123 | 0.46879 | 0.50736 | 1 |
| C | 0.44241 | 0.91124 | 0.49861 | 1 |
| C | 0.53118 | 0.44239 | 0.50018 | 1 |
| C | 0.08877 | 0.53122 | 0.50222 | 1 |
| C | 0.55761 | 0.08876 | 0.50485 | 1 |
| C | 0.95612 | 0.48486 | 0.50194 | 1 |
| C | 0.47125 | 0.95613 | 0.50018 | 1 |
| C | 0.51513 | 0.47124 | 0.50018 | 1 |
| C | 0.04388 | 0.51516 | 0.50018 | 1 |
| C | 0.52876 | 0.04387 | 0.50326 | 1 |
| C | 0.98552 | 0.52804 | 0.49983 | 1 |
| C | 0.45751 | 0.98556 | 0.50251 | 1 |
| C | 0.47195 | 0.4575 | 0.49986 | 1 |
| C | 0.01447 | 0.47199 | 0.50018 | 1 |
| C | 0.5425 | 0.01444 | 0.50113 | 1 |
| C | 0.02802 | 0.54262 | 0.4988 | 1 |
| C | 0.48545 | 0.02804 | 0.50376 | 1 |
| C | 0.45739 | 0.48542 | 0.49938 | 1 |
| C | 0.97198 | 0.4574 | 0.50049 | 1 |
| C | 0.51456 | 0.97196 | 0.49952 | 1 |
| Cl | 0.43525 | 0.40447 | 0.50018 | 1 |
| Cl | 0.03083 | 0.4353 | 0.50018 | 1 |
| Cl | 0.59553 | 0.03075 | 0.49952 | 1 |
| Cl | 0.56474 | 0.59551 | 0.50073 | 1 |
| Cl | 0.96917 | 0.56472 | 0.49687 | 1 |

**Table S6.** Fractional atomic coordinates and the unit cell of COF-Br.

| space group: *P6/m* | | | | |
| --- | --- | --- | --- | --- |
| α = 90.000°, β = 90.000°, γ = 120.000°  a = 36.977100 Å, b = 36.977100 Å, c = 3.746085 Å | | | | |
| Atom | x | y | z | Occupancy |
| H | 0.43969 | 0.75509 | 0.50006 | 1 |
| H | 0.48221 | 0.83357 | 0.50124 | 1 |
| H | 0.36869 | 0.83927 | 0.50006 | 1 |
| H | 0.32735 | 0.76206 | 0.49877 | 1 |
| H | 0.40893 | 0.90157 | 0.49743 | 1 |
| H | 0.47505 | 0.05105 | 0.50006 | 1 |
| N | 0.31384 | 0.69006 | 0.49979 | 1 |
| C | 0.29231 | 0.64795 | 0.50033 | 1 |
| C | 0.38089 | 0.75374 | 0.49928 | 1 |
| C | 0.2219 | 0.58312 | 0.50049 | 1 |
| C | 0.17861 | 0.5633 | 0.50006 | 1 |
| C | 0.15813 | 0.58693 | 0.50006 | 1 |
| C | 0.1827 | 0.63087 | 0.50006 | 1 |
| C | 0.22604 | 0.65069 | 0.50063 | 1 |
| N | 0.45605 | 0.88521 | 0.50083 | 1 |
| C | 0.46901 | 0.55782 | 0.50217 | 1 |
| C | 0.48516 | 0.52903 | 0.50006 | 1 |
| C | 0.52832 | 0.5425 | 0.49962 | 1 |
| C | 0.5428 | 0.51447 | 0.4998 | 1 |
| H | 0.68453 | 0.4397 | 0.50029 | 1 |
| H | 0.24499 | 0.68456 | 0.50091 | 1 |
| H | 0.56028 | 0.24489 | 0.49646 | 1 |
| H | 0.31547 | 0.56035 | 0.5007 | 1 |
| H | 0.75502 | 0.31545 | 0.49833 | 1 |
| H | 0.64859 | 0.48221 | 0.50083 | 1 |
| H | 0.16654 | 0.64865 | 0.49976 | 1 |
| H | 0.51777 | 0.16642 | 0.49699 | 1 |
| H | 0.35138 | 0.51782 | 0.49868 | 1 |
| H | 0.83347 | 0.35135 | 0.50028 | 1 |
| H | 0.52933 | 0.36867 | 0.49903 | 1 |
| H | 0.16067 | 0.52934 | 0.50006 | 1 |
| H | 0.6313 | 0.16074 | 0.50494 | 1 |
| H | 0.47067 | 0.63133 | 0.4992 | 1 |
| H | 0.83934 | 0.47066 | 0.50167 | 1 |
| H | 0.56517 | 0.32734 | 0.49984 | 1 |
| H | 0.23786 | 0.56515 | 0.50066 | 1 |
| H | 0.67263 | 0.23794 | 0.50254 | 1 |
| H | 0.43486 | 0.67269 | 0.50041 | 1 |
| H | 0.76216 | 0.43486 | 0.50088 | 1 |
| H | 0.50729 | 0.40893 | 0.50518 | 1 |
| H | 0.09839 | 0.50731 | 0.50162 | 1 |
| H | 0.59107 | 0.09841 | 0.49867 | 1 |
| H | 0.49269 | 0.59106 | 0.50801 | 1 |
| H | 0.90164 | 0.49269 | 0.49736 | 1 |
| H | 0.42398 | 0.47502 | 0.49951 | 1 |
| H | 0.94893 | 0.42397 | 0.49931 | 1 |
| H | 0.52494 | 0.94893 | 0.5007 | 1 |
| H | 0.57601 | 0.52497 | 0.50006 | 1 |
| H | 0.05109 | 0.57602 | 0.49935 | 1 |
| N | 0.62366 | 0.31383 | 0.49946 | 1 |
| N | 0.30994 | 0.62368 | 0.50046 | 1 |
| N | 0.68615 | 0.30995 | 0.49976 | 1 |
| N | 0.37635 | 0.68619 | 0.50006 | 1 |
| N | 0.69007 | 0.37635 | 0.49943 | 1 |
| C | 0.64423 | 0.29231 | 0.49946 | 1 |
| C | 0.35206 | 0.64427 | 0.50031 | 1 |
| C | 0.70769 | 0.35206 | 0.49952 | 1 |
| C | 0.35576 | 0.70771 | 0.49953 | 1 |
| C | 0.64796 | 0.35575 | 0.4995 | 1 |
| C | 0.62706 | 0.38089 | 0.49976 | 1 |
| C | 0.24627 | 0.62706 | 0.50061 | 1 |
| C | 0.61909 | 0.24626 | 0.49949 | 1 |
| C | 0.37295 | 0.61915 | 0.50053 | 1 |
| C | 0.75373 | 0.37294 | 0.49967 | 1 |
| C | 0.6387 | 0.22194 | 0.50164 | 1 |
| C | 0.41689 | 0.63875 | 0.50032 | 1 |
| C | 0.7781 | 0.41689 | 0.50057 | 1 |
| C | 0.36128 | 0.77807 | 0.49925 | 1 |
| C | 0.58312 | 0.36127 | 0.4997 | 1 |
| C | 0.61526 | 0.17864 | 0.50256 | 1 |
| C | 0.43672 | 0.6153 | 0.50006 | 1 |
| C | 0.8214 | 0.43671 | 0.50099 | 1 |
| C | 0.38472 | 0.82136 | 0.50006 | 1 |
| C | 0.56328 | 0.38471 | 0.4996 | 1 |
| C | 0.57114 | 0.1581 | 0.50053 | 1 |
| C | 0.41309 | 0.57117 | 0.49959 | 1 |
| C | 0.84188 | 0.41308 | 0.50059 | 1 |
| C | 0.42885 | 0.84189 | 0.50034 | 1 |
| C | 0.5869 | 0.42884 | 0.50006 | 1 |
| C | 0.55173 | 0.18263 | 0.49831 | 1 |
| C | 0.36915 | 0.55177 | 0.49963 | 1 |
| C | 0.8173 | 0.36914 | 0.50006 | 1 |
| C | 0.44826 | 0.81736 | 0.50047 | 1 |
| C | 0.63084 | 0.44825 | 0.50034 | 1 |
| C | 0.57522 | 0.22598 | 0.4979 | 1 |
| C | 0.34933 | 0.57528 | 0.50042 | 1 |
| C | 0.77396 | 0.34932 | 0.49929 | 1 |
| C | 0.42476 | 0.77401 | 0.49984 | 1 |
| C | 0.65067 | 0.42475 | 0.50006 | 1 |
| N | 0.5708 | 0.45605 | 0.49942 | 1 |
| N | 0.11481 | 0.57083 | 0.49935 | 1 |
| N | 0.54395 | 0.11478 | 0.50067 | 1 |
| N | 0.42919 | 0.54395 | 0.49831 | 1 |
| N | 0.8852 | 0.42917 | 0.50072 | 1 |
| C | 0.91118 | 0.469 | 0.49912 | 1 |
| C | 0.44217 | 0.91115 | 0.49944 | 1 |
| C | 0.53098 | 0.44217 | 0.50175 | 1 |
| C | 0.08884 | 0.531 | 0.50006 | 1 |
| C | 0.55783 | 0.08884 | 0.50006 | 1 |
| C | 0.95614 | 0.48516 | 0.49931 | 1 |
| C | 0.47096 | 0.95612 | 0.50006 | 1 |
| C | 0.51482 | 0.47097 | 0.50006 | 1 |
| C | 0.04388 | 0.51484 | 0.49932 | 1 |
| C | 0.52903 | 0.04387 | 0.50036 | 1 |
| C | 0.98584 | 0.52832 | 0.49946 | 1 |
| C | 0.4575 | 0.9858 | 0.50006 | 1 |
| C | 0.47167 | 0.45749 | 0.49979 | 1 |
| C | 0.01418 | 0.47168 | 0.49947 | 1 |
| C | 0.54249 | 0.01418 | 0.5005 | 1 |
| C | 0.02836 | 0.54281 | 0.49916 | 1 |
| C | 0.48553 | 0.02832 | 0.50027 | 1 |
| C | 0.45718 | 0.48552 | 0.49945 | 1 |
| C | 0.97166 | 0.45718 | 0.49931 | 1 |
| C | 0.51446 | 0.97165 | 0.50063 | 1 |
| Br | 0.39865 | 0.96828 | 0.49933 | 1 |
| Br | 0.56967 | 0.60137 | 0.49852 | 1 |
| Br | 0.43032 | 0.39863 | 0.50055 | 1 |
| Br | 0.03166 | 0.43032 | 0.50006 | 1 |
| Br | 0.60134 | 0.03169 | 0.50006 | 1 |
| Br | 0.96837 | 0.56968 | 0.50144 | 1 |

**Table S7.** Fractional atomic coordinates and the unit cell of COF-I.

| space group: *P6/m* | | | | |
| --- | --- | --- | --- | --- |
| α = 90.000°, β = 90.000°, γ = 120.000°  a = 36.973900 Å, b = 36.973900 Å, c = 3.957944 Å | | | | |
| Atom | x | y | z | Occupancy |
| H | 0.43983 | 0.75513 | 0.50279 | 1 |
| H | 0.48231 | 0.83359 | 0.50239 | 1 |
| H | 0.36875 | 0.83924 | 0.49987 | 1 |
| H | 0.32745 | 0.76204 | 0.49968 | 1 |
| H | 0.40892 | 0.90149 | 0.49557 | 1 |
| H | 0.4755 | 0.05136 | 0.50109 | 1 |
| N | 0.31392 | 0.69009 | 0.50081 | 1 |
| C | 0.29234 | 0.64799 | 0.50154 | 1 |
| C | 0.381 | 0.75374 | 0.5 | 1 |
| C | 0.22194 | 0.58319 | 0.49876 | 1 |
| C | 0.17864 | 0.56335 | 0.49821 | 1 |
| C | 0.15815 | 0.58697 | 0.50088 | 1 |
| C | 0.18271 | 0.63091 | 0.50241 | 1 |
| C | 0.22606 | 0.65074 | 0.50283 | 1 |
| N | 0.4561 | 0.88523 | 0.50058 | 1 |
| C | 0.4689 | 0.55771 | 0.51024 | 1 |
| C | 0.48532 | 0.52913 | 0.50385 | 1 |
| C | 0.52848 | 0.54263 | 0.50278 | 1 |
| C | 0.54272 | 0.51438 | 0.50055 | 1 |
| H | 0.68463 | 0.43977 | 0.50137 | 1 |
| H | 0.24501 | 0.6846 | 0.50392 | 1 |
| H | 0.5602 | 0.24489 | 0.49714 | 1 |
| H | 0.31539 | 0.56026 | 0.50085 | 1 |
| H | 0.75503 | 0.31541 | 0.5022 | 1 |
| H | 0.64871 | 0.4823 | 0.50178 | 1 |
| H | 0.16654 | 0.64869 | 0.50271 | 1 |
| H | 0.5177 | 0.16643 | 0.49792 | 1 |
| H | 0.35132 | 0.51773 | 0.49618 | 1 |
| H | 0.8335 | 0.35133 | 0.50147 | 1 |
| H | 0.5294 | 0.36879 | 0.50265 | 1 |
| H | 0.16071 | 0.52941 | 0.49442 | 1 |
| H | 0.63125 | 0.16076 | 0.50465 | 1 |
| H | 0.47062 | 0.63124 | 0.49496 | 1 |
| H | 0.83933 | 0.47063 | 0.49669 | 1 |
| H | 0.56523 | 0.32744 | 0.50221 | 1 |
| H | 0.23791 | 0.56524 | 0.4967 | 1 |
| H | 0.67256 | 0.23796 | 0.50384 | 1 |
| H | 0.43477 | 0.67257 | 0.50203 | 1 |
| H | 0.76213 | 0.43479 | 0.49811 | 1 |
| H | 0.50742 | 0.40895 | 0.49576 | 1 |
| H | 0.09848 | 0.50739 | 0.51351 | 1 |
| H | 0.59108 | 0.09852 | 0.49976 | 1 |
| H | 0.49243 | 0.59091 | 0.53014 | 1 |
| H | 0.90154 | 0.4926 | 0.51457 | 1 |
| H | 0.4241 | 0.47547 | 0.49995 | 1 |
| H | 0.94861 | 0.42414 | 0.50185 | 1 |
| H | 0.52448 | 0.94864 | 0.50295 | 1 |
| H | 0.57586 | 0.52451 | 0.49968 | 1 |
| H | 0.05143 | 0.57587 | 0.49982 | 1 |
| N | 0.62364 | 0.31388 | 0.50109 | 1 |
| N | 0.30993 | 0.62367 | 0.50226 | 1 |
| N | 0.68611 | 0.30992 | 0.50109 | 1 |
| N | 0.37638 | 0.68614 | 0.50109 | 1 |
| N | 0.6901 | 0.37635 | 0.50109 | 1 |
| C | 0.64419 | 0.29232 | 0.50109 | 1 |
| C | 0.35204 | 0.64422 | 0.50237 | 1 |
| C | 0.70769 | 0.35203 | 0.50109 | 1 |
| C | 0.35584 | 0.7077 | 0.50054 | 1 |
| C | 0.64798 | 0.35579 | 0.50109 | 1 |
| C | 0.62713 | 0.38097 | 0.50152 | 1 |
| C | 0.2463 | 0.62712 | 0.50137 | 1 |
| C | 0.61902 | 0.24627 | 0.5006 | 1 |
| C | 0.37289 | 0.61905 | 0.50295 | 1 |
| C | 0.75373 | 0.37289 | 0.50109 | 1 |
| C | 0.63863 | 0.22195 | 0.50252 | 1 |
| C | 0.41683 | 0.63864 | 0.50185 | 1 |
| C | 0.7781 | 0.41683 | 0.49955 | 1 |
| C | 0.36138 | 0.77806 | 0.49952 | 1 |
| C | 0.58319 | 0.36137 | 0.50198 | 1 |
| C | 0.6152 | 0.17865 | 0.50284 | 1 |
| C | 0.43667 | 0.6152 | 0.4988 | 1 |
| C | 0.8214 | 0.43667 | 0.49926 | 1 |
| C | 0.3848 | 0.82135 | 0.49954 | 1 |
| C | 0.56336 | 0.38482 | 0.50194 | 1 |
| C | 0.57107 | 0.15811 | 0.50109 | 1 |
| C | 0.41303 | 0.57108 | 0.49844 | 1 |
| C | 0.84189 | 0.41305 | 0.50109 | 1 |
| C | 0.42893 | 0.8419 | 0.49999 | 1 |
| C | 0.58699 | 0.42895 | 0.50137 | 1 |
| C | 0.55166 | 0.18263 | 0.49915 | 1 |
| C | 0.36908 | 0.55168 | 0.49879 | 1 |
| C | 0.81732 | 0.36911 | 0.50159 | 1 |
| C | 0.44836 | 0.81738 | 0.50109 | 1 |
| C | 0.63094 | 0.44835 | 0.50153 | 1 |
| C | 0.57515 | 0.22599 | 0.49877 | 1 |
| C | 0.34925 | 0.57519 | 0.50139 | 1 |
| C | 0.77397 | 0.34927 | 0.50184 | 1 |
| C | 0.42487 | 0.77403 | 0.50109 | 1 |
| C | 0.65076 | 0.42483 | 0.50147 | 1 |
| N | 0.57086 | 0.45613 | 0.50109 | 1 |
| N | 0.11482 | 0.57084 | 0.50005 | 1 |
| N | 0.5439 | 0.11478 | 0.50144 | 1 |
| N | 0.42915 | 0.5439 | 0.49488 | 1 |
| N | 0.88522 | 0.42917 | 0.50019 | 1 |
| C | 0.91118 | 0.46897 | 0.50644 | 1 |
| C | 0.44222 | 0.91116 | 0.49831 | 1 |
| C | 0.53105 | 0.44224 | 0.49849 | 1 |
| C | 0.08885 | 0.53103 | 0.50579 | 1 |
| C | 0.55778 | 0.08885 | 0.50088 | 1 |
| C | 0.9562 | 0.48535 | 0.50327 | 1 |
| C | 0.47083 | 0.95618 | 0.49958 | 1 |
| C | 0.51465 | 0.47085 | 0.49909 | 1 |
| C | 0.04384 | 0.51465 | 0.50286 | 1 |
| C | 0.52916 | 0.04383 | 0.50131 | 1 |
| C | 0.9859 | 0.52852 | 0.50161 | 1 |
| C | 0.45735 | 0.98585 | 0.49913 | 1 |
| C | 0.47148 | 0.45735 | 0.49817 | 1 |
| C | 0.01414 | 0.47149 | 0.50216 | 1 |
| C | 0.54264 | 0.01415 | 0.50184 | 1 |
| C | 0.02841 | 0.54274 | 0.50109 | 1 |
| C | 0.48562 | 0.02836 | 0.5007 | 1 |
| C | 0.45724 | 0.4856 | 0.50031 | 1 |
| C | 0.97163 | 0.45727 | 0.50215 | 1 |
| C | 0.51437 | 0.97164 | 0.50166 | 1 |
| I | 0.39222 | 0.96725 | 0.49591 | 1 |
| I | 0.57499 | 0.60777 | 0.49866 | 1 |
| I | 0.42494 | 0.39222 | 0.4949 | 1 |
| I | 0.03267 | 0.42493 | 0.49917 | 1 |
| I | 0.96735 | 0.57507 | 0.49789 | 1 |
| I | 0.60776 | 0.03271 | 0.50283 | 1 |

**4. References**

1 Li Y*, et al.* Constructing Solid-Gas-Interfacial Fenton Reaction over Alkalinized-C3N4 Photocatalyst To Achieve Apparent Quantum Yield of 49% at 420 nm. *J. Am. Chem. Soc.* **138**, 13289-13297 (2016).

2 Liu J*, et al.* Constructing Donor-Acceptor Covalent Organic Frameworks for Highly Efficient H2O2 Photosynthesis Coupled with Oxidative Organic Transformations. *Angew. Chem. Int. Ed.* **64**, e202416240 (2025).

3. Cao D, Du J, Li J, Sun Q, Guan J, Liu J. Hydroxyl-Functionalized Donor-Acceptor Covalent Organic Frameworks for Efficient Photocatalytic Hydrogen Peroxide Production under Visible Light. *ACS Catal.* **15**, 3584-3594 (2025).

4. Yu Z, Yu F, Xu M, Feng S, Qiu J, Hua J. Amidoxime-Functionalized sp2-Carbon-Conjugated Covalent Organic Frameworks for Overall Photocatalytic Hydrogen Peroxide Production. *Adv. Sci.* **12**, e2415194 (2025).

5. Shi X*, et al.* Interfacial Engineering of β‐Ketoenamine‐Based COFs/Urea‐Linked Perylene Diimide for Overall Photosynthesis of H2O2 in Seawater. *Adv. Funct. Mater.* **35**, 2414755 (2024).

6. Yue JY, Pan ZX, Zhang RZ, Xu Q, Yang P, Tang B. One‐Pot Synthesis of Fully Conjugated Covalent Organic Frameworks via the Pictet–Spengler Reaction for Boosting H2O2 Photogeneration in Real Seawater. *Adv. Funct. Mater.* **35**, 2421514 (2025).

7. Hou Y, Liu F, Liang J, Li Z, Zhou P, Tong M. Building a Confluence Charge Transfer Pathway in COFs for Highly Efficient Photosynthesis of Hydrogen Peroxide from Water and Air. *Angew. Chem. Int. Ed.* **64**, e202505621 (2025).

8. Yue JY*, et al.* Thiophene-Containing Covalent Organic Frameworks for Overall Photocatalytic H2O2 Synthesis in Water and Seawater. *Angew. Chem. Int. Ed.* **62**, e202309624 (2023).

9. Huang Y*, et al.* Nb2C MXene quantum dots modulate built-in electric field within heterostructures for efficient solar-to-H2O2 conversion from seawater. *Appl. Catal. B Environ.* **371**, 125262 (2025).

10. Yue J-Y*, et al.* Overall solar H2O2 generation in water and real seawater by covalent organic frameworks with kgd topology. *Chem. Eng. J* **504**, (2025).

11. Tang B*, et al.* Photocatalytic Synthesis of Hydrogen Peroxide by Rhenium Modified Metal-Organic Frameworks Incorporating Bianthracene Ligands. *J. Am. Chem. Soc.*, 10.1021/jacs.1025c00603 (2025).

12. Hu ZY, Liu T, Yang YR, An AK, Liew KM, Li WW. Binder-Free Immobilization of Photocatalyst on Membrane Surface for Efficient Photocatalytic H2O2 Production and Water Decontamination. *Nanomicro Lett.* **17**, 301 (2025).

13. Ju Y*, et al.* Regulating the electronic structure of covalent organic frameworks via heterocyclic isomers for highly efficient photocatalytic H2O2 generation. *Nat. Commun.* **16**, 5658 (2025).

14. Zhou J*, et al.* Covalent Organic Frameworks with Constrained Palladium Nanoclusters Lock the Enol-Keto Tautomerism Enhancing Hydrogen Peroxide Photosynthesis. *Small* **21**, e2409006 (2025).
